# Supplementary material for: Moxifloxacin Increases Heart Rate in Humans
Source: Antibiotics (Basel). 2017 Feb 5;6(1):5. doi: 10.3390/antibiotics6010005 (PMC5372985; doi:10.3390/antibiotics6010005)
Supplement: Supplementary File 1 [file antibiotics-06-00005-s001.xlsx]

## Sheet: Sheet1
Study	Subject ID	Study-subject ID	Age	Sex	time point	Hour	Time	ddHR	ddRR	ddPR	ddQRS	ddQT	ddQTcF
A	2001	A2001	21	M	P4H1	1	1	-8.77778	130.333	2.84217e-14	2.11111	28.3333	10.2222
A	2001	A2001	21	M	P4H2	2	2	-10.1111	146	-10.6667	3.11111	27.3333	7.22222
A	2001	A2001	21	M	P4H3	3	3	-13.4444	189	4.33333	2.44444	34.6667	8.55556
A	2001	A2001	21	M	P4H12	12	12	-6.44444	99	18	1.11111	21.3333	7.88889
A	2001	A2001	21	M	P4H24	24	24	-15.1111	223.667	0.666667	5.44444	44.6667	13.5556
A	2002	A2002	28	M	P3H1	1	1	2.22222	-33.6667	-11.1111	5	4.33333	8.77778
A	2002	A2002	28	M	P3H2	2	2	2.22222	-28	-8.44444	-1	-0.333333	3.77778
A	2002	A2002	28	M	P3H3	3	3	-3.77778	45.6667	-6.77778	4.66667	17	11.1111
A	2002	A2002	28	M	P3H12	12	12	1.88889	-37.3333	-13.7778	6.33333	4.33333	9.11111
A	2002	A2002	28	M	P3H24	24	24	2.22222	-34.6667	-7.44444	3.33333	1.33333	5.77778
A	2003	A2003	27	M	P2H1	1	1	11.1111	-218.778	13.1111	1.33333	6.55556	35
A	2003	A2003	27	M	P2H2	2	2	7.44444	-165.778	5.11111	0	1.55556	21.3333
A	2003	A2003	27	M	P2H3	3	3	7.11111	-152.111	13.1111	-1	9.22222	28
A	2003	A2003	27	M	P2H12	12	12	3.77778	-75.7778	0.111111	1.33333	16.8889	26
A	2003	A2003	27	M	P2H24	24	24	1.44444	-29.4444	9.44444	-2	20.8889	23.6667
A	2004	A2004	19	M	P1H1	1	1	8.55556	-121.556	1.11111	0.666667	1.66667	19.4444
A	2004	A2004	19	M	P1H2	2	2	9.88889	-120.889	4.11111	0.666667	-9.33333	8.77778
A	2004	A2004	19	M	P1H3	3	3	10.8889	-165.556	13.4444	-1.66667	-13.3333	9.11111
A	2004	A2004	19	M	P1H12	12	12	-3.11111	101.111	11.7778	2.33333	22.3333	11.1111
A	2004	A2004	19	M	P1H24	24	24	3.22222	-60.8889	2.77778	1.33333	-4.66667	3.11111
A	2005	A2005	24	M	P2H1	1	1	-8.55556	102.222	-3.66667	3.44444	32.8889	17.5556
A	2005	A2005	24	M	P2H2	2	2	0.111111	-11.4444	-0.666667	15.7778	12.8889	14.2222
A	2005	A2005	24	M	P2H3	3	3	4.77778	-77.1111	-2	0.111111	0.222222	10.8889
A	2005	A2005	24	M	P2H12	12	12	11.4444	-162.444	9.66667	7.44444	-9.77778	12.8889
A	2005	A2005	24	M	P2H24	24	24	7.77778	-132.444	-1.66667	4.11111	1.55556	18.5556
A	2006	A2006	18	M	P3H1	1	1	12.2222	-120	13	0.222222	4.11111	23.4444
A	2006	A2006	18	M	P3H2	2	2	-11.1111	106.333	-6.66667	2.22222	22.4444	6.77778
A	2006	A2006	18	M	P3H3	3	3	-1.77778	24.6667	2	-1.11111	22.4444	20.7778
A	2006	A2006	18	M	P3H12	12	12	-18.7778	202	3.33333	5.55556	43.4444	15.1111
A	2006	A2006	18	M	P3H24	24	24	2.88889	-29	7.66667	-4.77778	3.77778	8.77778
A	2007	A2007	23	M	P4H1	1	1	0.555556	-22.2222	-12.5556	0.333333	-4.88889	-2.66667
A	2007	A2007	23	M	P4H2	2	2	7.88889	-97.8889	-9.22222	-1.33333	-14.8889	-0.333333
A	2007	A2007	23	M	P4H3	3	3	5.55556	-65.5556	-6.55556	-2.33333	-2.55556	8
A	2007	A2007	23	M	P4H12	12	12	2.55556	-35.8889	-7.22222	2.33333	-1.55556	4
A	2007	A2007	23	M	P4H24	24	24	1.22222	-13.8889	0.444444	-2.33333	-3.55556	-1.33333
A	2008	A2008	20	M	P1H1	1	1	7.11111	-137	4.88889	-1.77778	-5.33333	13.5556
A	2008	A2008	20	M	P1H2	2	2	3.77778	-60	-9.44444	-2.11111	-1.33333	7.22222
A	2008	A2008	20	M	P1H3	3	3	-5.88889	50	-2.11111	-0.111111	18.3333	10.5556
A	2008	A2008	20	M	P1H12	12	12	6.11111	-100.667	3.88889	-5.11111	-6	7.55556
A	2008	A2008	20	M	P1H24	24	24	5.11111	-109.333	12.8889	-3.44444	-13.3333	1.55556
A	2009	A2009	45	M	P2H1	1	1	6.22222	-139.111	4.22222	-1.33333	-18	-0.777778
A	2009	A2009	45	M	P2H2	2	2	3.88889	-93.4444	7.88889	-3.66667	-2.66667	8.22222
A	2009	A2009	45	M	P2H3	3	3	3.88889	-72.7778	-1.11111	-2	-1	7.55556
A	2009	A2009	45	M	P2H12	12	12	3.22222	-62.4444	7.55556	-4.66667	-17.6667	-9.77778
A	2009	A2009	45	M	P2H24	24	24	-1.11111	21.8889	7.88889	0.666667	1.66667	-1.11111
A	2010	A2010	18	M	P4H1	1	1	20.1111	-243.667	4.88889	4.55556	-21.4444	16.6667
A	2010	A2010	18	M	P4H2	2	2	11.4444	-144	7.55556	-1.77778	-15.7778	6
A	2010	A2010	18	M	P4H3	3	3	7.77778	-110.667	-0.777778	-3.44444	-1.11111	15.6667
A	2010	A2010	18	M	P4H12	12	12	-8.88889	130	-7.11111	2.22222	8.88889	-10
A	2010	A2010	18	M	P4H24	24	24	0.777778	-6.33333	8.55556	0.222222	9.88889	11
A	2011	A2011	29	F	P1H1	1	1	2.11111	-14.3333	-0.777778	0.222222	6.88889	10.4444
A	2011	A2011	29	F	P1H2	2	2	-1.22222	25.6667	-11.1111	1.55556	16.8889	15.1111
A	2011	A2011	29	F	P1H3	3	3	-1.22222	19	7.22222	0.888889	17.5556	16.1111
A	2011	A2011	29	F	P1H12	12	12	2.44444	-20.6667	10.5556	-3.44444	10.8889	15.4444
A	2011	A2011	29	F	P1H24	24	24	-1.55556	31.3333	12.8889	4.22222	11.5556	7.77778
A	2012	A2012	38	F	P3H1	1	1	1.77778	-22.2222	-9.44444	-1.33333	-3.44444	0.444444
A	2012	A2012	38	F	P3H2	2	2	4.44444	-47.8889	-6.77778	-2.33333	-4.77778	3.77778
A	2012	A2012	38	F	P3H3	3	3	7.77778	-74.2222	-7.11111	-1.66667	-2.44444	12.1111
A	2012	A2012	38	F	P3H12	12	12	2.44444	-24.8889	-15.4444	-0.666667	-17.4444	-14.2222
A	2012	A2012	38	F	P3H24	24	24	-3.88889	39.1111	-9.77778	1.33333	0.222222	-6.55556
A	2013	A2013	31	F	P4H1	1	1	-0.555556	0.666667	-4	2.77778	14	14.4444
A	2013	A2013	31	F	P4H2	2	2	-12.8889	136	-1	5.11111	20.6667	-0.888889
A	2013	A2013	31	F	P4H3	3	3	-1.55556	13.6667	-7.33333	-0.888889	19	18.1111
A	2013	A2013	31	F	P4H12	12	12	-0.555556	6	-1.66667	6.44444	-1.66667	-2.22222
A	2013	A2013	31	F	P4H24	24	24	-3.55556	36.3333	-3	3.44444	5.66667	0.111111
A	2014	A2014	24	F	P3H1	1	1	3.22222	-44.7778	-1.55556	1.11111	3.55556	10.7778
A	2014	A2014	24	F	P3H2	2	2	-0.777778	14.2222	-0.222222	0.444444	4.55556	2.77778
A	2014	A2014	24	F	P3H3	3	3	-4.11111	43.8889	9.44444	0.111111	16.2222	10.4444
A	2014	A2014	24	F	P3H12	12	12	-3.77778	42.8889	6.11111	4.11111	15.2222	9.77778
A	2014	A2014	24	F	P3H24	24	24	-6.77778	80.8889	12.4444	3.44444	14.2222	2.44444
A	2015	A2015	30	F	P1H1	1	1	-2.33333	31.8889	-4.88889	-1.33333	6.33333	1.11111
A	2015	A2015	30	F	P1H2	2	2	-2.66667	31.5556	1.11111	-3.33333	21	17.4444
A	2015	A2015	30	F	P1H3	3	3	-2	26.5556	2.77778	-1	8.33333	4.77778
A	2015	A2015	30	F	P1H12	12	12	-2	27.8889	1.44444	-1.66667	5.33333	1.11111
A	2015	A2015	30	F	P1H24	24	24	0	-7.44444	8.77778	0.666667	2.66667	3.77778
A	2016	A2016	39	F	P2H1	1	1	1.33333	-15.4444	-2.77778	-5	-0.555556	2.88889
A	2016	A2016	39	F	P2H2	2	2	-4	72.2222	-6.77778	-4	22.7778	13.5556
A	2016	A2016	39	F	P2H3	3	3	9	-101.111	0.888889	-6.66667	-0.222222	16.5556
A	2016	A2016	39	F	P2H12	12	12	9.33333	-115.444	-4.77778	-4	-14.2222	3.88889
A	2016	A2016	39	F	P2H24	24	24	1	-0.777778	1.88889	-3	-8.88889	-8.11111
A	2017	A2017	39	F	P1H1	1	1	6.55556	-82.7778	-12.2222	-1.11111	3.88889	16.4444
A	2017	A2017	39	F	P1H2	2	2	-2.44444	13.8889	-9.55556	-2.11111	8.88889	6.44444
A	2017	A2017	39	F	P1H3	3	3	4.22222	-55.1111	-5.55556	1.88889	6.88889	15.7778
A	2017	A2017	39	F	P1H12	12	12	-0.111111	-13.7778	-11.8889	0.888889	8.55556	10.7778
A	2017	A2017	39	F	P1H24	24	24	1.88889	-27.1111	-13.5556	1.22222	-2.11111	2.11111
A	2019	A2019	23	F	P3H1	1	1	1	-9.77778	-0.222222	-0.333333	5.22222	7.22222
A	2019	A2019	23	F	P3H2	2	2	1	18.8889	-12.5556	2	2.22222	0.555556
A	2019	A2019	23	F	P3H3	3	3	2.66667	0.888889	-6.55556	1.66667	6.55556	8.22222
A	2019	A2019	23	F	P3H12	12	12	15.3333	-99.4444	-3.88889	9.33333	-9.77778	8.88889
A	2019	A2019	23	F	P3H24	24	24	7.33333	-73.4444	-7.88889	3.66667	-14.1111	-2.11111
A	2020	A2020	27	M	P4H1	1	1	-2.77778	57.1111	9.33333	0.333333	13.3333	7
A	2020	A2020	27	M	P4H2	2	2	4.88889	-33.8889	1.66667	2.66667	2.66667	10
A	2020	A2020	27	M	P4H3	3	3	-7.11111	131.111	-3.66667	2.33333	25.6667	10
A	2020	A2020	27	M	P4H12	12	12	-12.7778	215.444	1	4	21.6667	-6.66667
A	2020	A2020	27	M	P4H24	24	24	-11.4444	203.444	1	1.66667	22.3333	-3.33333
A	2021	A2021	42	M	P1H1	1	1	15.7778	-185	-9.55556	-2.22222	-30.6667	-2.55556
A	2021	A2021	42	M	P1H2	2	2	10.7778	-119.667	-11.2222	-2.88889	-16.3333	3.11111
A	2021	A2021	42	M	P1H3	3	3	6.44444	-70.6667	-5.22222	-5.22222	-12.6667	-1.55556
A	2021	A2021	42	M	P1H12	12	12	-5.22222	33.3333	7.44444	-1.55556	15.3333	10.4444
A	2021	A2021	42	M	P1H24	24	24	5.44444	-66.3333	-2.22222	0.777778	-3.66667	6.77778
A	2022	A2022	38	M	P2H1	1	1	1.33333	-14.3333	4.22222	-2.88889	-4.66667	-2.55556
A	2022	A2022	38	M	P2H2	2	2	-4.66667	68	14.2222	6.77778	3.66667	-5.55556
A	2022	A2022	38	M	P2H3	3	3	-7	89.6667	14.5556	7.77778	7.33333	-4.88889
A	2022	A2022	38	M	P2H12	12	12	-1.66667	29.6667	5.55556	9.11111	18	14.7778
A	2022	A2022	38	M	P2H24	24	24	-10	140	13.8889	4.77778	20.6667	1.77778
A	2023	A2023	44	M	P3H1	1	1	-5.77778	98	0.111111	2.88889	18.3333	5.22222
A	2023	A2023	44	M	P3H2	2	2	3.55556	-57	-0.222222	0.555556	0.333333	8.22222
A	2023	A2023	44	M	P3H3	3	3	0.222222	2	-1.55556	1.88889	9	9.55556
A	2023	A2023	44	M	P3H12	12	12	0.555556	5	0.111111	0.222222	-7.66667	-7.11111
A	2023	A2023	44	M	P3H24	24	24	1.22222	1.33333	0.444444	5.88889	12	13.8889
A	2024	A2024	32	M	P4H1	1	1	-3.33333	43.5556	-5.88889	0.555556	3.66667	-3.11111
A	2024	A2024	32	M	P4H2	2	2	3.66667	-40.7778	10.7778	0.222222	-0.666667	5.55556
A	2024	A2024	32	M	P4H3	3	3	1.33333	-21.7778	14.4444	1.88889	5	8.22222
A	2024	A2024	32	M	P4H12	12	12	-3	39.2222	-1.55556	0.555556	6.33333	0.888889
A	2024	A2024	32	M	P4H24	24	24	-7.66667	102.556	4.11111	0.555556	21	6.55556
A	2025	A2025	44	M	P2H1	1	1	-0.777778	14.5556	-3.11111	-2.55556	14.8889	13.2222
A	2025	A2025	44	M	P2H2	2	2	3.22222	-49.1111	-1.11111	1.11111	8.55556	15.5556
A	2025	A2025	44	M	P2H3	3	3	1.22222	-10.4444	-2.77778	-0.888889	7.88889	9.55556
A	2025	A2025	44	M	P2H12	12	12	2.88889	-32.7778	-10.7778	-3.88889	-3.77778	1.22222
A	2025	A2025	44	M	P2H24	24	24	-0.444444	16.8889	-0.444444	-1.55556	14.2222	12.5556
A	2026	A2026	39	M	P4H1	1	1	4.11111	-58.6667	3.22222	-2.22222	4	11.8889
A	2026	A2026	39	M	P4H2	2	2	-1.22222	15.3333	1.22222	1.44444	16.3333	14.8889
A	2026	A2026	39	M	P4H3	3	3	-0.888889	12.3333	-8.11111	-5.22222	17.3333	16.2222
A	2026	A2026	39	M	P4H12	12	12	-1.22222	25.6667	-6.11111	-1.88889	15	11.8889
A	2026	A2026	39	M	P4H24	24	24	1.11111	-14.3333	-1.44444	1.77778	-7.33333	-5.77778
A	2027	A2027	47	M	P3H1	1	1	-3	66.8889	4.66667	-0.333333	28	19
A	2027	A2027	47	M	P3H2	2	2	-7.33333	152.222	4	3.66667	46	25.3333
A	2027	A2027	47	M	P3H3	3	3	2.66667	-48.7778	7	-2.66667	15.6667	21.3333
A	2027	A2027	47	M	P3H12	12	12	1	-5.44444	8.33333	2.33333	18	18
A	2027	A2027	47	M	P3H24	24	24	-2.66667	57.5556	1.66667	-6	26.3333	18
A	2028	A2028	40	M	P1H1	1	1	8.11111	-110.778	-8.44444	1	-7.55556	8.33333
A	2028	A2028	40	M	P1H2	2	2	1.44444	-25.1111	1.88889	-4	1.44444	4
A	2028	A2028	40	M	P1H3	3	3	-7.22222	116.889	-2.44444	7.33333	13.7778	-2.33333
A	2028	A2028	40	M	P1H12	12	12	1.44444	-18.1111	5.88889	1.66667	7.77778	10.6667
A	2028	A2028	40	M	P1H24	24	24	-11.5556	209.222	16.2222	1.33333	18.4444	-9
A	2029	A2029	24	M	P2H1	1	1	1.77778	-55.8889	0.555556	-3.88889	0.666667	6.11111
A	2029	A2029	24	M	P2H2	2	2	0.111111	-21.5556	-0.111111	1.44444	-4.66667	-2.88889
A	2029	A2029	24	M	P2H3	3	3	-2.22222	-6.55556	2.55556	-4.55556	-2.66667	-3.88889
A	2029	A2029	24	M	P2H12	12	12	9.77778	-141.556	0.888889	-3.88889	-14.3333	4.44444
A	2029	A2029	24	M	P2H24	24	24	3.77778	-84.2222	-2.44444	-0.222222	-16.6667	-6.88889
A	2031	A2031	41	M	P1H1	1	1	7.10543e-15	-10.1111	-9.66667	2.11111	-1.33333	-0.222222
A	2031	A2031	41	M	P1H2	2	2	-8	107.889	-3	-1.55556	22.3333	8.44444
A	2031	A2031	41	M	P1H3	3	3	-3.33333	46.5556	-5	6.44444	12.3333	6.11111
A	2031	A2031	41	M	P1H12	12	12	-2	16.5556	-13.3333	-0.555556	-1.66667	-4.88889
A	2031	A2031	41	M	P1H24	24	24	-4	65.5556	-3	0.444444	20.6667	11.7778
A	2032	A2032	24	M	P4H1	1	1	5.22222	-63.8889	4.44444	-3.55556	1.66667	11.4444
A	2032	A2032	24	M	P4H2	2	2	-2.11111	37.4444	3.11111	-0.888889	15.6667	11.4444
A	2032	A2032	24	M	P4H3	3	3	-8.77778	132.778	2.77778	-1.55556	21.3333	3.77778
A	2032	A2032	24	M	P4H12	12	12	-4.44444	58.7778	-5.55556	-5.22222	8.33333	0.444444
A	2032	A2032	24	M	P4H24	24	24	-6.77778	104.444	-13.5556	-0.555556	11	-2.88889
A	2033	A2033	25	M	P2H1	1	1	-14.6667	251.556	1.44444	1.44444	48.1111	13.5556
A	2033	A2033	25	M	P2H2	2	2	-2	47.2222	2.44444	-1.22222	16.1111	11.5556
A	2033	A2033	25	M	P2H3	3	3	10.6667	-116.444	3.44444	0.444444	-21.5556	-3.11111
A	2033	A2033	25	M	P2H12	12	12	5.66667	-36.4444	-2.55556	1.11111	-29.2222	-22.1111
A	2033	A2033	25	M	P2H24	24	24	11	-198.111	1.44444	-3.22222	-19.8889	5.55556
A	2034	A2034	37	F	P1H1	1	1	25.7778	-215.111	7.44444	-3.77778	-24	15.4444
A	2034	A2034	37	F	P1H2	2	2	5.44444	-31.4444	0.777778	-7.44444	-2.66667	4.11111
A	2034	A2034	37	F	P1H3	3	3	2.11111	-5.11111	0.777778	-4.11111	-1.66667	0.111111
A	2034	A2034	37	F	P1H12	12	12	2.11111	14.5556	-6.55556	2.55556	6.33333	7.11111
A	2034	A2034	37	F	P1H24	24	24	3.11111	-47.7778	0.444444	2.88889	4	11.7778
A	2035	A2035	29	F	P4H1	1	1	1.33333	22.7778	-12.8889	0.111111	19.4444	19.3333
A	2035	A2035	29	F	P4H2	2	2	-10.6667	224.111	-13.5556	-0.222222	22.4444	-5.33333
A	2035	A2035	29	F	P4H3	3	3	-6.66667	156.778	-3.88889	1.44444	22.1111	2.66667
A	2035	A2035	29	F	P4H12	12	12	-6	144.111	-9.22222	2.44444	30.7778	13.3333
A	2035	A2035	29	F	P4H24	24	24	-4.33333	138.778	-20.5556	4.77778	19.4444	4.33333
A	2036	A2036	40	F	P3H1	1	1	0	4.77778	-6.88889	-4.22222	-10.4444	-12.3333
A	2036	A2036	40	F	P3H2	2	2	9	-98.2222	-3.88889	-1.88889	-5.44444	11
A	2036	A2036	40	F	P3H3	3	3	1.33333	-10.8889	-11.2222	-0.888889	4.88889	8
A	2036	A2036	40	F	P3H12	12	12	4	-29.5556	-5.55556	-4.22222	-11.1111	-6.33333
A	2036	A2036	40	F	P3H24	24	24	3.33333	-23.5556	-13.8889	-3.88889	-10.4444	-7
A	2037	A2037	20	F	P3H1	1	1	6	-47.8889	7.11111	-8.88889	3.66667	13.1111
A	2037	A2037	20	F	P3H2	2	2	19.3333	-137.889	0.777778	-1.88889	-8.66667	17.4444
A	2037	A2037	20	F	P3H3	3	3	7.33333	-57.8889	-1.22222	-3.88889	6.33333	18.1111
A	2037	A2037	20	F	P3H12	12	12	6	-37.2222	14.7778	1.44444	-13.6667	-7.55556
A	2037	A2037	20	F	P3H24	24	24	5.66667	-43.8889	2.44444	-1.88889	11.3333	20.4444
A	2038	A2038	37	F	P2H1	1	1	9.22222	-137	4.22222	-2	-9.44444	10.5556
A	2038	A2038	37	F	P2H2	2	2	6.55556	-98.3333	7.55556	-3.33333	-2.11111	12.2222
A	2038	A2038	37	F	P2H3	3	3	10.2222	-137.333	3.88889	-1.66667	-22.7778	-2.77778
A	2038	A2038	37	F	P2H12	12	12	7.88889	-113.333	7.55556	-0.666667	-7.44444	8.88889
A	2038	A2038	37	F	P2H24	24	24	6.55556	-90.3333	-7.77778	-4.33333	-12.4444	0.222222
A	2039	A2039	27	M	P1H1	1	1	-0.111111	-2.77778	-4.77778	-1.66667	19.7778	19.4444
A	2039	A2039	27	M	P1H2	2	2	2.22222	-33.4444	17.5556	0.333333	5.11111	9.44444
A	2039	A2039	27	M	P1H3	3	3	6.55556	-111.778	2.22222	-0.666667	-4.55556	11.1111
A	2039	A2039	27	M	P1H12	12	12	-3.11111	51.2222	-5.11111	-5.33333	13.4444	6.11111
A	2039	A2039	27	M	P1H24	24	24	2.55556	-38.1111	16.8889	-3	4.44444	9.11111
A	2040	A2040	29	M	P4H1	1	1	-7.88889	78.7778	9.44444	0.777778	19.4444	7.44444
A	2040	A2040	29	M	P4H2	2	2	-9.88889	104.778	5.11111	-2.22222	19.7778	3.77778
A	2040	A2040	29	M	P4H3	3	3	5.11111	-27.8889	-6.22222	1.44444	2.11111	8.11111
A	2040	A2040	29	M	P4H12	12	12	-8.22222	86.7778	10.4444	2.11111	22.4444	9.77778
A	2040	A2040	29	M	P4H24	24	24	-4.22222	44.1111	5.11111	3.11111	18.4444	12.7778
A	2041	A2041	20	M	P1H1	1	1	7.55556	-119.333	-2.22222	6.44444	-7.88889	8.55556
A	2041	A2041	20	M	P1H2	2	2	1.55556	14.3333	-2.22222	5.44444	6.44444	6.55556
A	2041	A2041	20	M	P1H3	3	3	-3.11111	79.3333	-1.88889	6.77778	16.4444	7.55556
A	2041	A2041	20	M	P1H12	12	12	-13.4444	246.667	0.777778	0.777778	19.7778	-10.4444
A	2041	A2041	20	M	P1H24	24	24	-10.4444	200.333	-5.55556	1.11111	28.1111	2.55556
A	2042	A2042	35	M	P2H1	1	1	0.888889	-29	-7.77778	3.33333	-2.22222	1.44444
A	2042	A2042	35	M	P2H2	2	2	-6.44444	90	4.55556	-1.33333	13.4444	0.444444
A	2042	A2042	35	M	P2H3	3	3	-0.444444	7.66667	-3.44444	0	17.1111	17.1111
A	2042	A2042	35	M	P2H12	12	12	12.2222	-212.333	-2.11111	-3.66667	-11.5556	17.7778
A	2042	A2042	35	M	P2H24	24	24	-1.44444	16.6667	1.22222	-2	3.44444	0.444444
A	2043	A2043	50	M	P4H1	1	1	6.66667	-122.444	-2	-2.55556	-15.1111	1
A	2043	A2043	50	M	P4H2	2	2	4.66667	-81.1111	-4.66667	4.44444	-5.44444	5
A	2043	A2043	50	M	P4H3	3	3	10	-146.111	-8	6.11111	-5.44444	15.3333
A	2043	A2043	50	M	P4H12	12	12	7.33333	-122.444	-2.84217e-14	2.11111	-8.44444	8.66667
A	2043	A2043	50	M	P4H24	24	24	1.66667	-33.7778	1.66667	1.44444	13.5556	18.3333
A	2045	A2045	28	M	P4H1	1	1	-8.44444	128.889	-2.44444	0.222222	25.6667	6.66667
A	2045	A2045	28	M	P4H2	2	2	-7.44444	107.556	-5.11111	-2.11111	-1.66667	-17.6667
A	2045	A2045	28	M	P4H3	3	3	-4.11111	61.5556	-1.11111	-4.77778	12.6667	3.66667
A	2045	A2045	28	M	P4H12	12	12	9.22222	-120.444	-1.11111	-13.4444	-16.6667	0.666667
A	2045	A2045	28	M	P4H24	24	24	5.88889	-100.778	5.55556	-9.44444	-17	-3.33333
A	2046	A2046	41	M	P3H1	1	1	2.66667	-24.7778	5.66667	3.33333	2.66667	6.44444
A	2046	A2046	41	M	P3H2	2	2	0	13.2222	0.333333	2.33333	5.33333	3.44444
A	2046	A2046	41	M	P3H3	3	3	-5.33333	122.889	3	-1	31.3333	16.7778
A	2046	A2046	41	M	P3H12	12	12	-4.66667	114.556	5	5.33333	39.3333	25.4444
A	2046	A2046	41	M	P3H24	24	24	-4.33333	99.5556	10	1	26	13.4444
A	2048	A2048	36	F	P2H1	1	1	1.55556	-13.2222	-7.11111	5.11111	10.5556	13.3333
A	2048	A2048	36	F	P2H2	2	2	3.22222	-43.8889	-3.11111	2.11111	4.88889	13
A	2048	A2048	36	F	P2H3	3	3	-0.777778	-3.22222	8.55556	3.11111	14.8889	15.6667
A	2048	A2048	36	F	P2H12	12	12	6.22222	-73.2222	-0.111111	-0.888889	-2.44444	10
A	2048	A2048	36	F	P2H24	24	24	-7.11111	81.4444	-4.11111	2.44444	20.5556	8.33333
A	2049	A2049	26	F	P1H1	1	1	-26.2222	216.556	15.1111	0.555556	61.8889	31.8889
A	2049	A2049	26	F	P1H2	2	2	3.44444	-15.4444	-2.55556	3.22222	12.5556	18.2222
A	2049	A2049	26	F	P1H3	3	3	0.777778	4.55556	-3.22222	1.22222	-3.11111	-3.11111
A	2049	A2049	26	F	P1H12	12	12	-5.22222	57.5556	-4.88889	0.888889	10.2222	2.88889
A	2049	A2049	26	F	P1H24	24	24	0.444444	3.22222	-0.888889	4.55556	-3.44444	-2.77778
A	2050	A2050	23	F	P2H1	1	1	5.33333	-82	18.6667	-1	-3.33333	7.77778
A	2050	A2050	23	F	P2H2	2	2	1	-11	-11	5	12	14.4444
A	2050	A2050	23	F	P2H3	3	3	3.33333	-39	-2.33333	11.6667	2	8.11111
A	2050	A2050	23	F	P2H12	12	12	-0.333333	14	-1.66667	2	1.33333	-1.22222
A	2050	A2050	23	F	P2H24	24	24	0	9	2	0.333333	-2.66667	-3.88889
A	2051	A2051	24	F	P4H1	1	1	9.11111	-101.556	-2.77778	-1.77778	-10.7778	6.44444
A	2051	A2051	24	F	P4H2	2	2	7.77778	-98.8889	-10.7778	5.55556	-8.11111	7.11111
A	2051	A2051	24	F	P4H3	3	3	0.111111	6.11111	-2.11111	3.55556	4.88889	4.77778
A	2051	A2051	24	F	P4H12	12	12	-0.888889	13.7778	5.22222	-2.77778	8.55556	6.77778
A	2051	A2051	24	F	P4H24	24	24	2.44444	-35.5556	2.22222	0.888889	0.888889	6.44444
A	2052	A2052	26	F	P3H1	1	1	4.44444	-43.2222	2.66667	0.333333	4.77778	13
A	2052	A2052	26	F	P3H2	2	2	1.11111	-5.88889	2.33333	-0.666667	26.1111	30
A	2052	A2052	26	F	P3H3	3	3	10.7778	-89.8889	2.66667	1	-4.22222	11.6667
A	2052	A2052	26	F	P3H12	12	12	-5.88889	52.7778	0	3	26.1111	18.6667
A	2052	A2052	26	F	P3H24	24	24	-4.22222	43.4444	4.66667	1.66667	24.4444	18
A	2053	A2053	34	F	P2H1	1	1	2.55556	-7.77778	-9.55556	-4.55556	-3.22222	-0.888889
A	2053	A2053	34	F	P2H2	2	2	1.22222	16.2222	2.44444	-1.22222	15.1111	14.4444
A	2053	A2053	34	F	P2H3	3	3	-1.77778	53.8889	-9.88889	-1.22222	8.11111	1.44444
A	2053	A2053	34	F	P2H12	12	12	-5.77778	99.8889	-4.88889	0.444444	39.7778	27.7778
A	2053	A2053	34	F	P2H24	24	24	0.555556	23.2222	-9.22222	-4.22222	-0.888889	-2.55556
A	2056	A2056	43	F	P3H1	1	1	-3.88889	86.6667	-1.88889	2.77778	5.77778	-5.33333
A	2056	A2056	43	F	P3H2	2	2	-3.55556	62	1.44444	1.77778	5.11111	-3
A	2056	A2056	43	F	P3H3	3	3	-0.888889	18.3333	0.777778	2.11111	3.11111	1.33333
A	2056	A2056	43	F	P3H12	12	12	-7.55556	137.333	2.77778	1.11111	13.7778	-4.66667
A	2056	A2056	43	F	P3H24	24	24	-0.888889	7	4.44444	0.777778	6.44444	4.66667
B	11	B11	49	M	01 Hour	1	1	1.66667	-209.907	-10.3333	1.33333	4.66667	9
B	11	B11	49	M	02 Hour	2	2	-3.33333	-90.9072	-3	2	21.6667	16.6667
B	11	B11	49	M	03 Hour	3	3	-8.33333	-90.2405	-1.66667	1	37	15.3333
B	11	B11	49	M	12 Hour	12	12	-11.6667	-62.2405	0.333333	-2.33333	22.3333	6.33333
B	11	B11	49	M	24 Hour	24	24	3.33333	-102.574	2.33333	1	17.3333	19.3333
B	12	B12	24	M	01 Hour	1	1	-4	75.619	12	19	47.6667	35.6667
B	12	B12	24	M	02 Hour	2	2	3	-33.381	-14.3333	7.33333	33	43
B	12	B12	24	M	03 Hour	3	3	-5.66667	-90.381	-18.3333	9.66667	27.3333	21.6667
B	12	B12	24	M	12 Hour	12	12	-2.66667	-4.04762	-10.3333	7	38	26.6667
B	12	B12	24	M	24 Hour	24	24	-2	105.952	10	6.33333	40.6667	35
B	13	B13	40	M	01 Hour	1	1	-4	-55.0124	-2	0	-1.66667	1
B	13	B13	40	M	02 Hour	2	2	-1	-16.3458	4	1	2	0.333333
B	13	B13	40	M	03 Hour	3	3	5.66667	-134.679	1.66667	-0.333333	9.66667	11.3333
B	13	B13	40	M	12 Hour	12	12	2	-60.6791	1.33333	0	-5.66667	-7.33333
B	13	B13	40	M	24 Hour	24	24	-2.66667	-101.012	3	0.333333	-9	-3
B	14	B14	43	M	01 Hour	1	1	-0.333333	-114.615	1	-4.66667	-19.3333	-11
B	14	B14	43	M	02 Hour	2	2	4.33333	-46.6154	4.73695e-15	-2.33333	-7.33333	-1.66667
B	14	B14	43	M	03 Hour	3	3	5.33333	-129.615	-0.333333	-0.333333	-2.66667	5.33333
B	14	B14	43	M	12 Hour	12	12	2.66667	-31.2821	-3.66667	1.66667	2.33333	10.6667
B	14	B14	43	M	24 Hour	24	24	-1	-7.94872	-8.33333	-4.33333	5.66667	-3.33333
B	15	B15	27	F	01 Hour	1	1	-7.33333	18.6327	1.33333	4.66667	19.6667	2.33333
B	15	B15	27	F	02 Hour	2	2	5	-54.034	-10.6667	7.33333	-10.3333	-1
B	15	B15	27	F	03 Hour	3	3	5.33333	-130.367	-7.66667	10	10.3333	11.3333
B	15	B15	27	F	12 Hour	12	12	8	-129.367	-10	-0.666667	-33.3333	-13
B	15	B15	27	F	24 Hour	24	24	-5.66667	6.96599	-1	5	-12.6667	-9.33333
B	16	B16	24	F	01 Hour	1	1	8	-155.178	-9.33333	6.66667	-2.33333	20.3333
B	16	B16	24	F	02 Hour	2	2	9	-139.844	10	4.33333	-21	-5.66667
B	16	B16	24	F	03 Hour	3	3	5.33333	-221.511	3.66667	6.66667	20.6667	38.6667
B	16	B16	24	F	12 Hour	12	12	8	-133.511	14	7.66667	-34.6667	-11.6667
B	16	B16	24	F	24 Hour	24	24	17.3333	-203.511	11	3.33333	-20	16
B	17	B17	33	F	01 Hour	1	1	-10	65.8107	16	7.66667	37.6667	12
B	17	B17	33	F	02 Hour	2	2	7	-135.189	16	-0.333333	4	9
B	17	B17	33	F	03 Hour	3	3	10	-208.189	11	5.66667	-3.33333	8.66667
B	17	B17	33	F	12 Hour	12	12	10.6667	-260.856	7.66667	4	-9.33333	4.66667
B	17	B17	33	F	24 Hour	24	24	1.33333	-33.1893	-2.66667	5.66667	2.33333	0.333333
B	18	B18	39	F	01 Hour	1	1	1.66667	-217.624	-7.33333	-4	-3	6
B	18	B18	39	F	02 Hour	2	2	5	-198.29	0	7	-2	13.3333
B	18	B18	39	F	03 Hour	3	3	-5	-299.29	9	3	8.66667	10
B	18	B18	39	F	12 Hour	12	12	14	-299.957	5.66667	-1.66667	-24.6667	5
B	18	B18	39	F	24 Hour	24	24	15.3333	-217.957	18.6667	8.33333	-32.3333	3
B	19	B19	25	F	01 Hour	1	1	-5	22.3333	1.33333	2.66667	17.6667	0.666667
B	19	B19	25	F	02 Hour	2	2	3	-23	1	-1.33333	-3	5
B	19	B19	25	F	03 Hour	3	3	3.66667	-178.667	-3	4	11.6667	18.6667
B	19	B19	25	F	12 Hour	12	12	-2.36848e-15	11.3333	2.33333	4.33333	11.3333	7.66667
B	19	B19	25	F	24 Hour	24	24	1	-50.6667	-6.33333	-0.333333	-18.3333	-15.6667
B	2	B2	31	M	01 Hour	1	1	9.33333	-208.823	11.6667	5.33333	12.6667	24.6667
B	2	B2	31	M	02 Hour	2	2	9	-196.156	-2	-4.33333	22.3333	32
B	2	B2	31	M	03 Hour	3	3	3.66667	-163.156	6.66667	-7.33333	16.3333	23
B	2	B2	31	M	12 Hour	12	12	4.66667	-189.49	7	-7.33333	-4	16
B	2	B2	31	M	24 Hour	24	24	2	-46.1565	10.3333	-5	20.6667	12.3333
B	20	B20	37	F	01 Hour	1	1	-1.33333	-110.111	6.33333	-1.66667	-2	-1.66667
B	20	B20	37	F	02 Hour	2	2	2.33333	-75.7778	11.3333	4.33333	7.66667	6
B	20	B20	37	F	03 Hour	3	3	11.6667	-229.111	8	-6.66667	-12	2.66667
B	20	B20	37	F	12 Hour	12	12	-5	-46.7778	10.3333	-3	22.6667	9.33333
B	20	B20	37	F	24 Hour	24	24	-1	-66.4444	-3.66667	1.33333	-7.66667	-5.66667
B	21	B21	40	F	01 Hour	1	1	-8	49.173	4.33333	1.66667	20.6667	3
B	21	B21	40	F	02 Hour	2	2	-6	103.173	2.33333	1	21.3333	18.6667
B	21	B21	40	F	03 Hour	3	3	-7	35.8397	-3	0.666667	31.6667	17
B	21	B21	40	F	12 Hour	12	12	-5	-27.4937	-7.33333	4	16.3333	6
B	21	B21	40	F	24 Hour	24	24	-3.66667	40.8397	-0.333333	2.66667	10.3333	-2
B	22	B22	47	F	01 Hour	1	1	3.66667	-118.587	-16.3333	-10	-2.66667	3.33333
B	22	B22	47	F	02 Hour	2	2	8.33333	-69.9199	-7.33333	-17	-17.6667	1.33333
B	22	B22	47	F	03 Hour	3	3	-1	-117.587	-10	-6	-5.33333	-6.66667
B	22	B22	47	F	12 Hour	12	12	3.66667	-10.2533	-11.6667	-10.6667	-13.3333	5
B	22	B22	47	F	24 Hour	24	24	-2	-46.9199	-8.33333	-7	14.3333	9.66667
B	24	B24	38	F	01 Hour	1	1	6.33333	-101	-0.333333	-9.66667	1	8.33333
B	24	B24	38	F	02 Hour	2	2	1.66667	-136.667	-10.3333	1	18	9
B	24	B24	38	F	03 Hour	3	3	12.3333	-192	2.66667	-9	-28.6667	4.33333
B	24	B24	38	F	12 Hour	12	12	3.66667	-140	4.33333	-4	4.66667	13
B	24	B24	38	F	24 Hour	24	24	-3.66667	-102	3.66667	0.333333	8.66667	1.66667
B	25	B25	42	F	01 Hour	1	1	25.6667	-515.333	-15.6667	-6.33333	-39	13.3333
B	25	B25	42	F	02 Hour	2	2	11.3333	-172	8.66667	-3.33333	-4	25.6667
B	25	B25	42	F	03 Hour	3	3	1.33333	-123	8	-4	6	10.3333
B	25	B25	42	F	12 Hour	12	12	6.66667	-30.6667	16.6667	-5	-12	7.66667
B	25	B25	42	F	24 Hour	24	24	4.66667	-141	13.3333	-2	-24.6667	-4.33333
B	26	B26	18	F	01 Hour	1	1	5.33333	-129.282	17	-5.33333	-18.3333	-3
B	26	B26	18	F	02 Hour	2	2	3	-71.6158	31.6667	-1	0.666667	4
B	26	B26	18	F	03 Hour	3	3	-7	-118.616	5	-2.66667	28	11
B	26	B26	18	F	12 Hour	12	12	-2.66667	-132.616	26.3333	9.66667	24.6667	10
B	26	B26	18	F	24 Hour	24	24	-9.66667	-87.6158	8.33333	-4	37.3333	18.3333
B	27	B27	26	M	01 Hour	1	1	2	-36.0755	-3.33333	-1.66667	-8.66667	-9.66667
B	27	B27	26	M	02 Hour	2	2	4.66667	-182.075	1.33333	-1.33333	-9	5
B	27	B27	26	M	03 Hour	3	3	3.33333	-125.075	8	-10.3333	0.333333	5.66667
B	27	B27	26	M	12 Hour	12	12	5.33333	-46.7421	-2.66667	-1	-8	5.66667
B	27	B27	26	M	24 Hour	24	24	6.33333	-117.075	1.66667	-1.66667	-1.33333	9.33333
B	28	B28	21	M	01 Hour	1	1	26.6667	-263.429	13.3333	-5	-44.3333	8
B	28	B28	21	M	02 Hour	2	2	30.3333	-226.095	13	-17.6667	-47	8.33333
B	28	B28	21	M	03 Hour	3	3	17.6667	-116.762	12	-6.66667	-7	32.3333
B	28	B28	21	M	12 Hour	12	12	20.3333	-63.4286	9	-7	-29.6667	13
B	28	B28	21	M	24 Hour	24	24	22.6667	-183.095	4	-13.6667	-21	23.6667
B	29	B29	29	M	01 Hour	1	1	2.66667	-28.8235	-5.33333	3.33333	2	6
B	29	B29	29	M	02 Hour	2	2	-1.66667	-15.4902	-13.6667	3.66667	17.6667	11.3333
B	29	B29	29	M	03 Hour	3	3	3.33333	45.1765	-2	3.33333	6.33333	9.33333
B	29	B29	29	M	12 Hour	12	12	1.66667	-78.1569	-17	-4	17.3333	13.6667
B	29	B29	29	M	24 Hour	24	24	5.33333	74.5098	0.333333	2.33333	-6.66667	2.33333
B	3	B3	41	M	01 Hour	1	1	-4.66667	-117.713	0.666667	0	-2	-1
B	3	B3	41	M	02 Hour	2	2	12.3333	-275.713	-15	10	-14.3333	21.3333
B	3	B3	41	M	03 Hour	3	3	9	-282.713	-15	-5.33333	-21	11
B	3	B3	41	M	12 Hour	12	12	-3.66667	-176.046	9.33333	8.66667	10.3333	10
B	3	B3	41	M	24 Hour	24	24	0.666667	-71.046	-4	0.666667	-7.66667	-0.666667
B	30	B30	33	M	01 Hour	1	1	6.66667	-98.7958	15.3333	-7	-0.666667	5.66667
B	30	B30	33	M	02 Hour	2	2	8.33333	-156.796	12.6667	-14.6667	-8.66667	10.6667
B	30	B30	33	M	03 Hour	3	3	5.66667	-166.796	11	-9	-8.66667	6
B	30	B30	33	M	12 Hour	12	12	-0.333333	-66.7958	8.33333	-10	14.6667	11
B	30	B30	33	M	24 Hour	24	24	-6	-33.7958	13.3333	-1	27.6667	13
B	31	B31	30	M	01 Hour	1	1	36.3333	-349.905	-22.3333	-0.333333	-33	15
B	31	B31	30	M	02 Hour	2	2	-4.66667	36.7619	-1	2.33333	4	-1
B	31	B31	30	M	03 Hour	3	3	-1.33333	40.4286	-0.666667	3.33333	1.33333	2.66667
B	31	B31	30	M	12 Hour	12	12	-3.66667	-73.2381	1.33333	4	14.6667	11.3333
B	31	B31	30	M	24 Hour	24	24	-3	63.0952	-6.66667	-9.4739e-15	12	3.33333
B	33	B33	46	M	01 Hour	1	1	11	-217.163	-3.66667	4.66667	15.3333	29.3333
B	33	B33	46	M	02 Hour	2	2	2	-144.83	-2.33333	-1.66667	-2.66667	15
B	33	B33	46	M	03 Hour	3	3	6.33333	-256.83	-3.33333	3	3.66667	27
B	33	B33	46	M	12 Hour	12	12	-4.33333	-145.497	-5	6.33333	18.6667	16.6667
B	33	B33	46	M	24 Hour	24	24	14	-225.163	-7.66667	0	-9.66667	17.6667
B	34	B34	47	M	01 Hour	1	1	-0.666667	-83.3333	27.6667	7	-6.33333	5.66667
B	34	B34	47	M	02 Hour	2	2	-1	-38	11.3333	10.6667	18.3333	16.3333
B	34	B34	47	M	03 Hour	3	3	1	-107.667	-9.66667	12.6667	0.333333	4
B	34	B34	47	M	12 Hour	12	12	5.33333	-66.6667	-7.33333	11	8.66667	18.6667
B	34	B34	47	M	24 Hour	24	24	-2	-77.6667	-9.33333	0.333333	-12.3333	-1.83557e-14
B	35	B35	25	M	01 Hour	1	1	7.66667	-148.949	-16.6667	-5.33333	8	15.3333
B	35	B35	25	M	02 Hour	2	2	4.33333	-34.9492	-1.66667	-1.66667	13.3333	20.3333
B	35	B35	25	M	03 Hour	3	3	8.66667	-152.949	-11	0.333333	-1	13.6667
B	35	B35	25	M	12 Hour	12	12	5	-135.616	-6.33333	-6.66667	1	10.3333
B	35	B35	25	M	24 Hour	24	24	3	-19.9492	-1	-13	-4	4.33333
B	36	B36	24	M	01 Hour	1	1	5	-10.4086	-16.6667	3	1	13
B	36	B36	24	M	02 Hour	2	2	2.66667	5.5914	-16	13	13	18.3333
B	36	B36	24	M	03 Hour	3	3	-2.33333	-54.7419	-8.33333	7.33333	14	11.6667
B	36	B36	24	M	12 Hour	12	12	5.66667	36.2581	3.33333	1.66667	3	15.3333
B	36	B36	24	M	24 Hour	24	24	3.33333	20.5914	-7.33333	-0.333333	9	12
B	37	B37	28	M	01 Hour	1	1	-6.33333	38.1176	5.33333	-11	9.33333	19.3333
B	37	B37	28	M	02 Hour	2	2	-15	81.451	-0.666667	9	34	13.3333
B	37	B37	28	M	03 Hour	3	3	-9.33333	71.1176	7.66667	5	35.3333	9
B	37	B37	28	M	12 Hour	12	12	-17.6667	198.784	11	6.66667	33	8
B	37	B37	28	M	24 Hour	24	24	-19.3333	233.118	27	-6	46.6667	23.6667
B	39	B39	35	M	01 Hour	1	1	16.3333	-93.1494	1	-2	27.6667	73.3333
B	39	B39	35	M	02 Hour	2	2	-2	223.851	1.33333	4.33333	32.3333	41.6667
B	39	B39	35	M	03 Hour	3	3	2.66667	101.851	0.666667	-5	42	41.3333
B	39	B39	35	M	12 Hour	12	12	10.3333	71.1839	1	2.66667	26.3333	54.6667
B	39	B39	35	M	24 Hour	24	24	7	97.1839	3.33333	4.73695e-15	44.3333	57
B	4	B4	19	M	01 Hour	1	1	0.666667	-56.9487	-8.33333	6	-1.33333	-5.33333
B	4	B4	19	M	02 Hour	2	2	1.33333	-179.949	-0.666667	1	-4.33333	5.33333
B	4	B4	19	M	03 Hour	3	3	25.6667	-554.282	-66.3333	-5.33333	-50.6667	6.66667
B	4	B4	19	M	12 Hour	12	12	4.66667	-173.949	-6.66667	5	-11.3333	4.33333
B	4	B4	19	M	24 Hour	24	24	4.33333	-111.949	-2	-2.66667	-16	2
B	40	B40	36	M	01 Hour	1	1	9	-196.202	-8.33333	-12	-30.3333	-12.3333
B	40	B40	36	M	02 Hour	2	2	4.66667	-27.5353	-8	-0.666667	-6.33333	-2.66667
B	40	B40	36	M	03 Hour	3	3	8	-117.535	-2	-2.66667	-4	10.3333
B	40	B40	36	M	12 Hour	12	12	7.33333	-163.202	-10	-15.3333	-18	1
B	40	B40	36	M	24 Hour	24	24	2.33333	-164.535	-4.66667	-0.333333	9.66667	11.3333
B	41	B41	20	M	01 Hour	1	1	27.6667	-242.758	-15.3333	-3.66667	-36.3333	9
B	41	B41	20	M	02 Hour	2	2	9.33333	-21.0909	-1.66667	-2.33333	-13.3333	12.6667
B	41	B41	20	M	03 Hour	3	3	9.66667	-50.4242	-8	-3.66667	-14.3333	8
B	41	B41	20	M	12 Hour	12	12	7.66667	-74.0909	3	-2	-15	-1.33333
B	41	B41	20	M	24 Hour	24	24	12.3333	-19.4242	-1.66667	-7	-18.6667	9
B	42	B42	21	M	01 Hour	1	1	-6.33333	-42.2982	14.3333	3	6.33333	1.89478e-14
B	42	B42	21	M	02 Hour	2	2	5	-124.298	13.3333	-6.33333	-9.66667	5.66667
B	42	B42	21	M	03 Hour	3	3	-1.66667	-191.298	10.3333	0	0.666667	7
B	42	B42	21	M	12 Hour	12	12	3	-220.298	18	0.333333	5.66667	11.3333
B	42	B42	21	M	24 Hour	24	24	-2	-21.6316	34.6667	4.33333	14.3333	8
B	44	B44	34	M	01 Hour	1	1	-5.33333	42.6937	9.66667	-4.33333	10.6667	2
B	44	B44	34	M	02 Hour	2	2	4.73695e-15	-33.3063	-4.66667	8	30.3333	24.6667
B	44	B44	34	M	03 Hour	3	3	-3.66667	-54.6396	-3	-12.6667	14	8
B	44	B44	34	M	12 Hour	12	12	-2.66667	60.3604	-3	4.66667	31.3333	25
B	44	B44	34	M	24 Hour	24	24	-2.33333	-0.306306	5.33333	-9.66667	24.6667	11.6667
B	45	B45	39	F	01 Hour	1	1	-19	116.072	23.6667	-16.6667	17	-25.3333
B	45	B45	39	F	02 Hour	2	2	-1.66667	82.0725	19.3333	-18	-12	-13
B	45	B45	39	F	03 Hour	3	3	-23.3333	92.4058	12	-3	67.6667	9.33333
B	45	B45	39	F	12 Hour	12	12	-13.6667	-55.2609	14.6667	-13.6667	8	-18
B	45	B45	39	F	24 Hour	24	24	-11.6667	180.072	6.66667	-2	-3.66667	-29.3333
B	46	B46	18	F	01 Hour	1	1	4.33333	-37.6791	9	-0.333333	26	24
B	46	B46	18	F	02 Hour	2	2	-2	-42.6791	5.33333	-5.33333	17	16
B	46	B46	18	F	03 Hour	3	3	6.33333	-137.012	-8	-0.333333	6.33333	21.3333
B	46	B46	18	F	12 Hour	12	12	1.66667	-172.012	-0.666667	-13	6.66667	8.33333
B	46	B46	18	F	24 Hour	24	24	-2	-30.6791	3.66667	3.33333	35	24
B	47	B47	23	F	01 Hour	1	1	-2	7.81072	-5.66667	8.33333	-12.3333	9
B	47	B47	23	F	02 Hour	2	2	-6.66667	49.8107	-3.33333	7	50.6667	29.6667
B	47	B47	23	F	03 Hour	3	3	2.33333	-112.856	-3.66667	1.66667	34.6667	31
B	47	B47	23	F	12 Hour	12	12	-7.66667	-134.523	-9.66667	2	43.6667	29.6667
B	47	B47	23	F	24 Hour	24	24	-3.66667	-43.8559	-8.33333	5	33.3333	24.3333
B	48	B48	18	F	01 Hour	1	1	0.333333	-128.011	12	-2.33333	10.6667	3.33333
B	48	B48	18	F	02 Hour	2	2	-5.66667	-164.678	7	4	4.33333	-4
B	48	B48	18	F	03 Hour	3	3	-6.33333	-115.011	11	0.333333	27	11.3333
B	48	B48	18	F	12 Hour	12	12	2.66667	-119.344	2.66667	2.66667	25.6667	25
B	48	B48	18	F	24 Hour	24	24	-18.6667	23.3223	-3.66667	2	49.6667	12.6667
B	49	B49	26	F	01 Hour	1	1	-0.333333	23.996	3.33333	-0.333333	3.66667	7.66667
B	49	B49	26	F	02 Hour	2	2	2	25.6627	13	4.66667	7.66667	9.66667
B	49	B49	26	F	03 Hour	3	3	-5	-97.004	0.666667	3.66667	21.3333	12.6667
B	49	B49	26	F	12 Hour	12	12	8.33333	-200.671	4.33333	5.33333	-1	16
B	49	B49	26	F	24 Hour	24	24	7.33333	-139.004	12.3333	4.33333	-12	2
B	5	B5	45	M	01 Hour	1	1	-5	40.0389	-4	-2.33333	16.3333	4
B	5	B5	45	M	02 Hour	2	2	2	14.7055	20.6667	-0.333333	1	7.33333
B	5	B5	45	M	03 Hour	3	3	-4.66667	-40.9611	-3	-2.33333	24.3333	7.66667
B	5	B5	45	M	12 Hour	12	12	-0.666667	-101.628	3.66667	-0.666667	9	4.33333
B	5	B5	45	M	24 Hour	24	24	-5	52.7055	-1.33333	-3.66667	11.6667	4.33333
B	50	B50	31	F	01 Hour	1	1	0.333333	17.5861	-2.33333	-2.66667	14	21.3333
B	50	B50	31	F	02 Hour	2	2	-0.666667	43.2528	-9.33333	0.666667	14.3333	14.3333
B	50	B50	31	F	03 Hour	3	3	-8.66667	30.5861	-7.33333	3.33333	40	19.6667
B	50	B50	31	F	12 Hour	12	12	-0.333333	15.2528	-7.33333	-7	15.3333	14.3333
B	50	B50	31	F	24 Hour	24	24	9.4739e-15	-34.0806	9.4739e-15	-0.333333	21.6667	19
B	52	B52	23	F	01 Hour	1	1	13	-178.344	7.66667	-2.66667	-32.3333	0.666667
B	52	B52	23	F	02 Hour	2	2	8.33333	-125.011	8.66667	2	-0.666667	14.3333
B	52	B52	23	F	03 Hour	3	3	10.3333	-183.344	-15.6667	3.66667	-1.33333	12.3333
B	52	B52	23	F	12 Hour	12	12	5	-43.011	4.33333	-2.66667	-37.3333	-7.66667
B	52	B52	23	F	24 Hour	24	24	-0.333333	-36.3443	2.66667	1.33333	18.6667	26.6667
B	53	B53	26	F	01 Hour	1	1	4	-43.1291	-2	8.33333	8.33333	11.3333
B	53	B53	26	F	02 Hour	2	2	7	-27.4624	-1.33333	20	-0.333333	16
B	53	B53	26	F	03 Hour	3	3	10.6667	-176.796	-2	9	-10.3333	17.3333
B	53	B53	26	F	12 Hour	12	12	8.66667	-22.1291	-0.333333	6.66667	3.66667	16.6667
B	53	B53	26	F	24 Hour	24	24	21	-174.129	-0.666667	14	-22	16
B	54	B54	25	F	01 Hour	1	1	-3.33333	-52	-10.3333	4	-22.3333	-11.3333
B	54	B54	25	F	02 Hour	2	2	-0.333333	-92	-9	6.33333	26	22.3333
B	54	B54	25	F	03 Hour	3	3	1.66667	-101	9	4	-20.3333	-21
B	54	B54	25	F	12 Hour	12	12	-2.36848e-15	-179	6	5.66667	-0.666667	3.33333
B	54	B54	25	F	24 Hour	24	24	-7.33333	14	9	5.66667	11	-8
B	55	B55	18	F	01 Hour	1	1	1.66667	32.193	13.3333	-0.333333	5.33333	6.66667
B	55	B55	18	F	02 Hour	2	2	1.33333	53.193	-2.66667	-1.66667	0.666667	10.6667
B	55	B55	18	F	03 Hour	3	3	-3	52.8596	3.33333	-5.33333	14.3333	10.3333
B	55	B55	18	F	12 Hour	12	12	-5	92.8596	-12.3333	6	12.3333	6.66667
B	55	B55	18	F	24 Hour	24	24	-3	102.526	8	-8.33333	4.33333	-6
B	56	B56	37	F	01 Hour	1	1	-1.33333	-12.4751	-5	-3	-5	-4
B	56	B56	37	F	02 Hour	2	2	-2	9.52486	-10.6667	4	16.6667	12
B	56	B56	37	F	03 Hour	3	3	-3	-30.4751	-15	5.66667	16.3333	5
B	56	B56	37	F	12 Hour	12	12	-7	-27.8085	-3	-1	11	-0.666667
B	56	B56	37	F	24 Hour	24	24	0	-69.4751	8	-5.33333	-19.3333	-23.6667
B	6	B6	32	M	01 Hour	1	1	-32.3333	-62.3063	20.6667	8.33333	72	33
B	6	B6	32	M	02 Hour	2	2	1.33333	-91.3063	6	0.333333	17.3333	18.6667
B	6	B6	32	M	03 Hour	3	3	2.66667	-108.306	-0.666667	-0.333333	7	3
B	6	B6	32	M	12 Hour	12	12	7.10543e-15	-41.6396	-3.33333	9.33333	2.66667	3
B	6	B6	32	M	24 Hour	24	24	1	-153.306	5.33333	-7	4.66667	4.66667
B	7	B7	47	M	01 Hour	1	1	-1.66667	-139.846	14	4	25.6667	21
B	7	B7	47	M	02 Hour	2	2	-2.33333	-19.1795	4.33333	-8.33333	17	10.3333
B	7	B7	47	M	03 Hour	3	3	1.66667	-147.179	-4	-3.66667	30.6667	26.3333
B	7	B7	47	M	12 Hour	12	12	3.66667	-191.179	3.33333	-12.6667	10	11.3333
B	7	B7	47	M	24 Hour	24	24	-4.66667	16.1538	-4.66667	0.333333	27.3333	10.3333
B	8	B8	36	M	01 Hour	1	1	-5	5	14	-9.66667	2	1.66667
B	8	B8	36	M	02 Hour	2	2	-2.66667	18.6667	-1.66667	8.66667	27	11.3333
B	8	B8	36	M	03 Hour	3	3	-3	-25	-3	10.6667	-17	-6
B	8	B8	36	M	12 Hour	12	12	-4	-43	2	-8.33333	4.66667	-7
B	8	B8	36	M	24 Hour	24	24	-3.33333	56.3333	7	-8	13	4
B	9	B9	30	M	01 Hour	1	1	16.6667	-248.845	23.3333	-4.33333	-60	-24
B	9	B9	30	M	02 Hour	2	2	-4	-55.1783	12.6667	-9.4739e-15	7	-9
B	9	B9	30	M	03 Hour	3	3	-9.66667	25.155	13	3.66667	18	-3.33333
B	9	B9	30	M	12 Hour	12	12	2.33333	-39.845	19	-0.333333	1.33333	-0.666667
B	9	B9	30	M	24 Hour	24	24	-7	93.8217	11.3333	-4.33333	9.66667	-9
C	2001	C2001	38	F		1	1	9.33333	-117.667	4.33333	-0.333333	-24.6667	-7.33333
C	2001	C2001	38	F		2	2	8	-103.667	-1.66667	0.333333	-16	0
C	2001	C2001	38	F		3	3	1.66667	-33.3333	7.66667	-4.73695e-15	-4.33333	0.333333
C	2001	C2001	38	F		12	12	19.6667	-213.333	-12.3333	0.666667	-47.3333	-14.3333
C	2001	C2001	38	F		24	24	12	-138.333	-18.3333	-8.33333	-48.3333	-28.3333
C	2002	C2002	29	F		1	1	4	-60.6667	-3	4	-10.3333	-1
C	2002	C2002	29	F		2	2	6.33333	-127.333	-9.33333	-1.66667	7	23
C	2002	C2002	29	F		3	3	13.3333	-218	15	-2	7	37.6667
C	2002	C2002	29	F		12	12	4.66667	-79.3333	0.666667	-2.33333	20.6667	30.3333
C	2002	C2002	29	F		24	24	13	-237.667	18.6667	5	-11.6667	19
C	2003	C2003	41	F		1	1	-4	28.6667	1	2.66667	-4.33333	-11.3333
C	2003	C2003	41	F		2	2	-7.33333	64.6667	-5.33333	0.333333	21	11.6667
C	2003	C2003	41	F		3	3	-1	10.6667	-0.333333	2.33333	17	17.3333
C	2003	C2003	41	F		12	12	6.66667	-51	-4.33333	-11.6667	0.333333	11.3333
C	2003	C2003	41	F		24	24	-1	10	8.33333	1.33333	13	12.6667
C	2004	C2004	40	F		1	1	5.66667	-62	8	1	-11	-1.66667
C	2004	C2004	40	F		2	2	4.66667	-56	12.3333	1	-13.3333	-4.66667
C	2004	C2004	40	F		3	3	-2	14.3333	-16.3333	-2	18.6667	17.3333
C	2004	C2004	40	F		12	12	-14.6667	118	-28	3.66667	15.6667	-6.66667
C	2004	C2004	40	F		24	24	2.33333	-19.3333	2.33333	2.33333	-3.66667	-0.333333
C	2005	C2005	29	F		1	1	3.33333	-42.3333	13	-0.333333	21	28.3333
C	2005	C2005	29	F		2	2	14.6667	-209.333	-0.333333	4.33333	2	33
C	2005	C2005	29	F		3	3	9.66667	-132.667	8.33333	-5.33333	15.3333	35.3333
C	2005	C2005	29	F		12	12	1	-23	6.66667	-7.66667	10.6667	14.3333
C	2005	C2005	29	F		24	24	2	-25.3333	-4.33333	-4	9	13
C	2006	C2006	31	F		1	1	-15.6667	156.333	5	2.33333	30.6667	5.33333
C	2006	C2006	31	F		2	2	-1	13.3333	-5	1.33333	18	17.3333
C	2006	C2006	31	F		3	3	-5	56.6667	-14.3333	-0.333333	19.6667	11
C	2006	C2006	31	F		12	12	8	-67.6667	-14.6667	-1.33333	-2.33333	8.66667
C	2006	C2006	31	F		24	24	-0.666667	13.3333	-12	-0.666667	13.6667	12.6667
C	2007	C2007	44	F		1	1	0.666667	-2.33333	37.6667	0	-7.66667	-7.33333
C	2007	C2007	44	F		2	2	2.66667	-28.6667	7.66667	8.33333	4.66667	10.3333
C	2007	C2007	44	F		3	3	-1.66667	23.3333	24	-2.33333	8	4.66667
C	2007	C2007	44	F		12	12	-7.33333	65.6667	9.66667	7.66667	9.66667	-1.33333
C	2007	C2007	44	F		24	24	0.333333	-0.333333	-9.33333	-5.66667	-1.89478e-14	-1.89478e-14
C	2008	C2008	30	F		1	1	9.33333	-112.333	5	5	-15	1.66667
C	2008	C2008	30	F		2	2	-1	20	3	7	14	12.3333
C	2008	C2008	30	F		3	3	3	-62.3333	4	-0.333333	11	20.3333
C	2008	C2008	30	F		12	12	8	-105.667	2.33333	0.666667	13.6667	30.6667
C	2008	C2008	30	F		24	24	6.66667	-87	10	0.333333	21.6667	36.3333
C	2009	C2009	36	F		1	1	6	-94	5.66667	-0.333333	19.3333	34
C	2009	C2009	36	F		2	2	-0.666667	17	-2.66667	-6.33333	48.3333	47
C	2009	C2009	36	F		3	3	-0.333333	3.66667	3.66667	-6.33333	19	19.3333
C	2009	C2009	36	F		12	12	-4.66667	62	11.6667	-2	25.6667	17
C	2009	C2009	36	F		24	24	4.33333	-60	5	6.33333	9.66667	18.3333
C	2010	C2010	24	F		1	1	-16.6667	190.667	-21.6667	1	29.3333	-1
C	2010	C2010	24	F		2	2	-7.33333	109.667	-22.3333	-4	24.3333	8.33333
C	2010	C2010	24	F		3	3	-5.66667	98.6667	-2	0.333333	19.6667	6.33333
C	2010	C2010	24	F		12	12	10	-88.6667	-20	-2	-27.3333	-12
C	2010	C2010	24	F		24	24	-4.33333	65	-28	2	7	-3
C	2011	C2011	29	M		1	1	-2.66667	37.3333	10	-1.66667	4.66667	-1
C	2011	C2011	29	M		2	2	-7	94.6667	-13.6667	-1	18.6667	3.66667
C	2011	C2011	29	M		3	3	0.666667	0.333333	-7.33333	-2	7.66667	7
C	2011	C2011	29	M		12	12	-17	174.333	9.33333	2	27.6667	-1
C	2011	C2011	29	M		24	24	-0.333333	-3.78956e-14	-6.33333	-3.33333	-3.33333	-4.33333
C	2012	C2012	30	M		1	1	5.33333	-80	1	-2	6.66667	17.6667
C	2012	C2012	30	M		2	2	10	-161.667	-12.6667	-8	19.3333	39.6667
C	2012	C2012	30	M		3	3	8	-129	-2	6.33333	5	22.3333
C	2012	C2012	30	M		12	12	10.3333	-172.667	1.33333	1.66667	1.66667	24
C	2012	C2012	30	M		24	24	-2	66	-1	11.6667	28	20
C	2013	C2013	24	M		1	1	1.66667	-22.3333	-12.3333	-5.66667	14.3333	18
C	2013	C2013	24	M		2	2	3	-64	-11.6667	4.66667	1	9
C	2013	C2013	24	M		3	3	2.66667	-57.6667	-32	-5.33333	10.6667	18.3333
C	2013	C2013	24	M		12	12	3.66667	-54	-34.6667	-5.33333	4	12.3333
C	2013	C2013	24	M		24	24	3	-56.6667	-24.6667	3.33333	-8.33333	-0.333333
C	2014	C2014	28	M		1	1	6.66667	-202.667	-2.66667	-1	-11.6667	11.6667
C	2014	C2014	28	M		2	2	6	-184.667	9.66667	-1	-10.6667	9.66667
C	2014	C2014	28	M		3	3	2.66667	-99.6667	8	2.66667	9	19.3333
C	2014	C2014	28	M		12	12	5.33333	-153.333	15	-1	16	30.6667
C	2014	C2014	28	M		24	24	3.33333	-85.6667	5	-2.33333	1.89478e-14	9
C	2015	C2015	32	M		1	1	6.33333	-132.333	-0.666667	-6.33333	-12.6667	2
C	2015	C2015	32	M		2	2	9	-177	-5.33333	3.66667	-23	-1
C	2015	C2015	32	M		3	3	6.33333	-114.333	-13.3333	-4.33333	-3	12
C	2015	C2015	32	M		12	12	4.66667	-93	7.33333	-3.66667	-22	-10.3333
C	2015	C2015	32	M		24	24	6.33333	-74.6667	1.33333	1.66667	-12.3333	0
C	2016	C2016	31	M		1	1	2	-17	1.33333	-8.66667	-13	-11.3333
C	2016	C2016	31	M		2	2	-4	56	-9.66667	0.333333	7.66667	-3.78956e-14
C	2016	C2016	31	M		3	3	-0.666667	-7	-0.333333	-10.6667	6	6.66667
C	2016	C2016	31	M		12	12	-9.33333	112	-5	-4.66667	17	-3.78956e-14
C	2016	C2016	31	M		24	24	2	-32.6667	-4.33333	2	8.33333	13
C	2017	C2017	43	M		1	1	3	-74.6667	6.66667	-12.3333	9.66667	16.3333
C	2017	C2017	43	M		2	2	2.66667	-63.6667	-4.66667	2	25.6667	30
C	2017	C2017	43	M		3	3	2	-29.6667	-2	-6	20	21.3333
C	2017	C2017	43	M		12	12	-3	90.6667	8	-2.66667	18.6667	7.66667
C	2017	C2017	43	M		24	24	14	-261	-5.33333	-10.3333	-17.3333	17.6667
C	2018	C2018	20	M		1	1	5.66667	-151.667	-5	2.33333	9.33333	27.3333
C	2018	C2018	20	M		2	2	1	-27.3333	3.66667	3.66667	4.66667	6.33333
C	2018	C2018	20	M		3	3	1.66667	-59.3333	-1	8	13.6667	19.6667
C	2018	C2018	20	M		12	12	3.66667	-121	-3.33333	6.33333	21	35
C	2018	C2018	20	M		24	24	-0.333333	-1.66667	1.33333	0	23	21
C	2019	C2019	23	M		1	1	1.66667	1	7	1.66667	1.66667	2.66667
C	2019	C2019	23	M		2	2	7.33333	-86	4.66667	-4	-12.3333	-0.333333
C	2019	C2019	23	M		3	3	-4.33333	81	-6.66667	7	16.3333	7.33333
C	2019	C2019	23	M		12	12	-4.33333	79	-1.66667	4.73695e-15	13	4.33333
C	2019	C2019	23	M		24	24	-8	128.333	-0.666667	-1.33333	8	-8.33333
C	2020	C2020	28	F		1	1	10	-100.333	-23	-1	-15.6667	0.333333
C	2020	C2020	28	F		2	2	4.66667	-49.6667	-7.33333	-0.666667	-2.66667	4.66667
C	2020	C2020	28	F		3	3	4.73695e-15	-6	-12.3333	-0.666667	4.33333	6
C	2020	C2020	28	F		12	12	-1.66667	18	-12.6667	6	13	11
C	2020	C2020	28	F		24	24	-3.66667	43.3333	-18.6667	2.66667	22	17.6667
C	2021	C2021	39	F		1	1	1	-30.6667	2.33333	-3	0.333333	4.33333
C	2021	C2021	39	F		2	2	4.33333	-89.3333	-1.33333	-3.33333	-13	-0.666667
C	2021	C2021	39	F		3	3	-1	20.6667	-0.333333	1	21.6667	18.6667
C	2021	C2021	39	F		12	12	5	-82	-5.66667	-0.333333	-5.33333	6
C	2021	C2021	39	F		24	24	3	-65	1.33333	-1	3.33333	12
C	2022	C2022	18	F		1	1	-3.66667	51	-6.66667	4.33333	-2.66667	-12
C	2022	C2022	18	F		2	2	7.33333	-104.333	-3	7.66667	6	21.6667
C	2022	C2022	18	F		3	3	10	-129	8.33333	6.33333	12	32.3333
C	2022	C2022	18	F		12	12	5.66667	-72	-1.66667	7	8.66667	19.6667
C	2022	C2022	18	F		24	24	8.33333	-112	3.33333	3.33333	-1.66667	15.6667
C	2023	C2023	36	F		1	1	5.33333	-64	0.666667	2	-1.89478e-14	10.3333
C	2023	C2023	36	F		2	2	13	-191.667	10	-4.73695e-15	-18.6667	11
C	2023	C2023	36	F		3	3	14	-138.333	17	1	-7	17.3333
C	2023	C2023	36	F		12	12	1	-12.3333	-2	-4	8.66667	11.3333
C	2023	C2023	36	F		24	24	7	-86.6667	-7.66667	-8.33333	-19.6667	-6
C	2024	C2024	27	F		1	1	7.66667	-116	0.666667	-8.66667	-9	8.33333
C	2024	C2024	27	F		2	2	9.66667	-117.667	5	-3.33333	-3.66667	15.6667
C	2024	C2024	27	F		3	3	1	-7.33333	7	2.33333	12.6667	14.6667
C	2024	C2024	27	F		12	12	2.33333	-16	6.33333	-1.66667	9	13
C	2024	C2024	27	F		24	24	-8.66667	114	4.66667	1.33333	35.6667	19.6667
C	2025	C2025	43	F		1	1	1.33333	-18	-13.3333	1.33333	-27.6667	-26.6667
C	2025	C2025	43	F		2	2	7	-73.3333	-13.6667	8	-30.3333	-19.6667
C	2025	C2025	43	F		3	3	12	-119.333	-11	8.33333	-23.3333	-3.66667
C	2025	C2025	43	F		12	12	-2	14.3333	-7.33333	-1.66667	-16.3333	-20.6667
C	2025	C2025	43	F		24	24	9.4739e-15	12.3333	-8.33333	8.66667	1.89478e-14	-2
C	2026	C2026	23	F		1	1	2.33333	-33	5.66667	-4.73695e-15	-1.33333	3.66667
C	2026	C2026	23	F		2	2	6	-63	15.6667	1	-12	-2.33333
C	2026	C2026	23	F		3	3	7	-78	15	-9.33333	10.6667	25.3333
C	2026	C2026	23	F		12	12	1.33333	-22	10.6667	-3.33333	2.66667	5.66667
C	2026	C2026	23	F		24	24	1.33333	-18.6667	6.66667	3.66667	12.6667	15.6667
C	2027	C2027	25	F		1	1	14.3333	-178.333	2.33333	-3.66667	-4.33333	23.3333
C	2027	C2027	25	F		2	2	10	-84.6667	-10.6667	1.33333	7	22
C	2027	C2027	25	F		3	3	23.3333	-285.667	-0.333333	10.6667	-2.66667	44.3333
C	2027	C2027	25	F		12	12	-6	51.3333	-1.66667	0.666667	36	29.3333
C	2027	C2027	25	F		24	24	18	-209.333	-6.66667	-5.33333	-15	18
C	2028	C2028	19	F		1	1	2.33333	-29.3333	-18.6667	-2.66667	-27.3333	-24.3333
C	2028	C2028	19	F		2	2	12.3333	-195.333	-18.3333	4	-21	5.66667
C	2028	C2028	19	F		3	3	13.6667	-171.667	7.33333	2	7.66667	34
C	2028	C2028	19	F		12	12	-16.3333	179.333	-6.33333	4	24.6667	-3
C	2028	C2028	19	F		24	24	-3.66667	65	-3	4	3.66667	-5.66667
C	2030	C2030	22	M		1	1	-8.66667	129.333	-8	1.33333	5.66667	-12.3333
C	2030	C2030	22	M		2	2	-4	48.3333	-3.33333	2.33333	-0.666667	-8.33333
C	2030	C2030	22	M		3	3	3.33333	-0.333333	-8.33333	-3	-11	-9.66667
C	2030	C2030	22	M		12	12	-2.66667	45.3333	2.66667	-6	-6	-12.6667
C	2030	C2030	22	M		24	24	-9.33333	141	7.66667	-6	5	-15
C	2031	C2031	45	M		1	1	-0.666667	13	-4.33333	5.66667	21.3333	19.3333
C	2031	C2031	45	M		2	2	6.33333	-107.667	-8.33333	15	2.33333	16.6667
C	2031	C2031	45	M		3	3	0.666667	-18.3333	8	-7.33333	-3.33333	-0.666667
C	2031	C2031	45	M		12	12	0.666667	-12.3333	-2.66667	2	3.66667	5
C	2031	C2031	45	M		24	24	-1.66667	18.3333	-1	0.333333	24	21
C	2033	C2033	19	M		1	1	-21.3333	252.333	-8.66667	16	35	-0.666667
C	2033	C2033	19	M		2	2	-14	187.667	-7.33333	5	26	0.666667
C	2033	C2033	19	M		3	3	-6	97.3333	2.33333	-9.66667	14.6667	1.33333
C	2033	C2033	19	M		12	12	-2	70.3333	8.66667	-7	7	-0.333333
C	2033	C2033	19	M		24	24	-14.6667	208.667	9.66667	-6	35.3333	7
C	2034	C2034	20	M		1	1	11	-124	23	1.33333	-26.6667	-8.33333
C	2034	C2034	20	M		2	2	15	-178	16.6667	-3.66667	-13.6667	13
C	2034	C2034	20	M		3	3	11.6667	-151	16	-2	-12.6667	9.33333
C	2034	C2034	20	M		12	12	7.66667	-100	16.3333	-1.33333	-12	2.33333
C	2034	C2034	20	M		24	24	16.3333	-223.333	26	-5.66667	-35.3333	-4.66667
C	2035	C2035	32	M		1	1	7.33333	-78	-2.66667	-2.66667	-0.666667	11.6667
C	2035	C2035	32	M		2	2	-14.3333	175.333	-3.66667	5.66667	39	12.6667
C	2035	C2035	32	M		3	3	-1.66667	25.3333	-11.3333	8.33333	42	40.3333
C	2035	C2035	32	M		12	12	-3.33333	35.6667	-17.3333	8	17.6667	13
C	2035	C2035	32	M		24	24	6.33333	-86	-9.66667	-4.66667	-5	7
C	2036	C2036	41	M		1	1	17	-255.333	-20.3333	9.66667	-35.6667	-0.333333
C	2036	C2036	41	M		2	2	21.6667	-341.333	-25.6667	12.3333	-14	32.6667
C	2036	C2036	41	M		3	3	16	-229.667	-15.3333	1	-16.3333	16.6667
C	2036	C2036	41	M		12	12	17.3333	-249	-13.6667	6.33333	-17.3333	18
C	2036	C2036	41	M		24	24	20.6667	-325.333	-27.3333	9.66667	-31.6667	12.6667
C	2037	C2037	36	M		1	1	-3.33333	35	4.33333	-6	0.333333	-6.33333
C	2037	C2037	36	M		2	2	5.66667	-116	1	-2	2	18
C	2037	C2037	36	M		3	3	6.66667	-115.667	-1.66667	-3.66667	-12	3
C	2037	C2037	36	M		12	12	5.66667	-109.667	-6.66667	-6	2.66667	17.3333
C	2037	C2037	36	M		24	24	-1.33333	24	2.66667	-1.66667	2	-3.33333
C	2039	C2039	28	F		1	1	-0.666667	17.6667	-0.333333	0.333333	8.66667	5.33333
C	2039	C2039	28	F		2	2	10.3333	-117	-4.33333	-6.66667	1	19.3333
C	2039	C2039	28	F		3	3	11	-122	-16.6667	-5.33333	2.33333	21.6667
C	2039	C2039	28	F		12	12	3.66667	-40.6667	-9	-11	12	18.3333
C	2039	C2039	28	F		24	24	2	-15.3333	-6.33333	-8	6.33333	8
C	2040	C2040	33	F		1	1	1.66667	-12.6667	23.6667	-4	0	3.66667
C	2040	C2040	33	F		2	2	-6.66667	82.6667	28	-6	22.6667	10.6667
C	2040	C2040	33	F		3	3	-9.66667	102	19	0.666667	24.3333	9.33333
C	2040	C2040	33	F		12	12	-3	35.6667	29	-1.66667	5.66667	1.33333
C	2040	C2040	33	F		24	24	-1.66667	24	4.33333	5	5	2
C	2041	C2041	39	F		1	1	-21.6667	392.667	1.66667	-8	70	17
C	2041	C2041	39	F		2	2	-13.3333	242	11.3333	-19	34.6667	2
C	2041	C2041	39	F		3	3	-29	486.333	-15.6667	13.3333	113.333	49
C	2041	C2041	39	F		12	12	-8	223	16.6667	-7.66667	35.6667	7.66667
C	2041	C2041	39	F		24	24	-14.6667	269.667	8.33333	-9	52	16
C	2042	C2042	41	F		1	1	4.33333	-56.3333	2.33333	3	12	19.3333
C	2042	C2042	41	F		2	2	1.66667	-22.6667	8.33333	2.66667	22.3333	26.6667
C	2042	C2042	41	F		3	3	6.33333	-92.3333	-1.33333	10.6667	9	22.6667
C	2042	C2042	41	F		12	12	0.666667	-68.6667	-5	3.66667	-0.333333	7.66667
C	2042	C2042	41	F		24	24	8.33333	-120.333	1	1.33333	-13.3333	2.66667
C	2043	C2043	26	F		1	1	5.66667	-124.667	5.66667	8.66667	-4	11.6667
C	2043	C2043	26	F		2	2	7	-127	-1.33333	1.66667	6.66667	23
C	2043	C2043	26	F		3	3	7.66667	-152.667	5	1.33333	-13.3333	7.66667
C	2043	C2043	26	F		12	12	2.66667	-85.6667	-8.33333	-10.6667	-11	-0.333333
C	2043	C2043	26	F		24	24	4.66667	-81.3333	-1.33333	4	-3.33333	7.33333
C	2044	C2044	30	F		1	1	3.33333	-26.6667	-4.33333	2.33333	2.33333	8.33333
C	2044	C2044	30	F		2	2	2.33333	-20.6667	-2.33333	1.33333	4.66667	9
C	2044	C2044	30	F		3	3	-0.666667	0.333333	-3	4.66667	5	6
C	2044	C2044	30	F		12	12	-6	41	1.33333	6.33333	17.3333	11.3333
C	2044	C2044	30	F		24	24	4	-38	-3.33333	-3	13.6667	23
C	2045	C2045	18	F		1	1	10.6667	-213.333	61.6667	1.66667	8.66667	34
C	2045	C2045	18	F		2	2	3.66667	-79.6667	27.3333	-5.66667	-1	8
C	2045	C2045	18	F		3	3	-6.33333	91.3333	3.33333	-4.33333	27.6667	14.6667
C	2045	C2045	18	F		12	12	-3	37	15.3333	-5.66667	6.66667	1.33333
C	2045	C2045	18	F		24	24	-5	90.3333	14	-5.66667	23.3333	11.3333
C	2046	C2046	29	F		1	1	20.3333	-209.333	-10.6667	-2	-35	-2
C	2046	C2046	29	F		2	2	6.33333	-69.3333	-11.3333	-3	-1	10.6667
C	2046	C2046	29	F		3	3	9.33333	-94.6667	-4.66667	5.33333	-16.6667	-1.66667
C	2046	C2046	29	F		12	12	7.33333	-84	-1	-4.66667	-12	2
C	2046	C2046	29	F		24	24	3.66667	-44	-5.33333	-1	-18	-11.6667
C	2047	C2047	27	F		1	1	6.66667	-72	6	-4.33333	-26.6667	-16.3333
C	2047	C2047	27	F		2	2	10	-87	-27.6667	-6	-19	-4.66667
C	2047	C2047	27	F		3	3	-3.33333	52.6667	2.33333	-13	-5.66667	-14
C	2047	C2047	27	F		12	12	-3.66667	44	-11	-3.66667	11.3333	5.33333
C	2047	C2047	27	F		24	24	1	-4	-4.33333	-8.66667	-5	-5.33333
C	2048	C2048	24	F		1	1	-1.66667	3	-30.6667	-1.66667	4.66667	4
C	2048	C2048	24	F		2	2	8.33333	-98.3333	-21.6667	9.4739e-15	6	22.6667
C	2048	C2048	24	F		3	3	-0.666667	-5.66667	-22.3333	3.33333	2	3
C	2048	C2048	24	F		12	12	5	-66.6667	-9.33333	19	-15.3333	-6.33333
C	2048	C2048	24	F		24	24	-1.33333	3.33333	-0.333333	5	5.66667	5
C	2050	C2050	35	F		1	1	2.66667	-40.3333	-9	3	-8.66667	-3.33333
C	2050	C2050	35	F		2	2	-28.6667	262	-35.6667	10.3333	22.3333	-25
C	2050	C2050	35	F		3	3	5.66667	-72	-3.66667	-3.33333	-11.3333	-1.66667
C	2050	C2050	35	F		12	12	11	-134	-5.33333	3.33333	-17.3333	3.33333
C	2050	C2050	35	F		24	24	7	-82	-8.33333	2.33333	-10.3333	2
C	2051	C2051	50	M		1	1	-9.33333	129	-5.33333	-3	28	11.6667
C	2051	C2051	50	M		2	2	-14.3333	198.333	-5.33333	0.666667	25.3333	-2.33333
C	2051	C2051	50	M		3	3	-18	261	10.3333	-1.66667	28.6667	-6
C	2051	C2051	50	M		12	12	-13.6667	167.667	3.66667	3	30	6.33333
C	2051	C2051	50	M		24	24	-15.6667	198.333	-4.66667	2.66667	33.6667	5.66667
C	2052	C2052	38	M		1	1	-10.3333	256.667	-4.66667	11.6667	61.3333	27
C	2052	C2052	38	M		2	2	1.33333	-64.3333	-3	-8	10.6667	15.6667
C	2052	C2052	38	M		3	3	-2.33333	38.6667	1.33333	-9.33333	10	4.33333
C	2052	C2052	38	M		12	12	1.33333	-17.6667	1.66667	-10.3333	15.3333	16
C	2052	C2052	38	M		24	24	-7	167.667	-6	-23	22	1.66667
C	2054	C2054	23	M		1	1	-15.3333	186	11.3333	-1.66667	21	-8
C	2054	C2054	23	M		2	2	11	-242.333	-13.3333	-8.33333	-5	23.6667
C	2054	C2054	23	M		3	3	10.6667	-240.667	-16.3333	-13.3333	-9.66667	19.3333
C	2054	C2054	23	M		12	12	-2.33333	37.3333	5.33333	-2	22	16.3333
C	2054	C2054	23	M		24	24	-1.66667	39.6667	2.66667	-9.66667	18.3333	13
C	2055	C2055	32	M		1	1	19.6667	-249.333	11	-4	-9.66667	29
C	2055	C2055	32	M		2	2	16.6667	-208	18.6667	-5.33333	-11.6667	20.3333
C	2055	C2055	32	M		3	3	10	-94.6667	27.3333	-9	1	17.3333
C	2055	C2055	32	M		12	12	16.6667	-208.667	28	-23	-46.6667	-15.6667
C	2055	C2055	32	M		24	24	29.3333	-351.667	33	-13.6667	-30.3333	25
C	2056	C2056	21	M		1	1	-3.66667	67.3333	-10	1.66667	9	0.666667
C	2056	C2056	21	M		2	2	-8.33333	137.667	-11	4.33333	27	9.66667
C	2056	C2056	21	M		3	3	3	-20.3333	1.33333	-2.33333	16.3333	20
C	2056	C2056	21	M		12	12	-13.6667	209.667	27.3333	2	30.3333	2.33333
C	2056	C2056	21	M		24	24	-3.33333	63.3333	21.6667	-3.33333	21.6667	13.3333
C	2057	C2057	23	M		1	1	3.66667	-49.3333	-6	-0.333333	-14	-7.66667
C	2057	C2057	23	M		2	2	14.3333	-229	24.3333	-8	-33.6667	-4.33333
C	2057	C2057	23	M		3	3	3	-51.6667	5.66667	-10	-16.6667	-10.6667
C	2057	C2057	23	M		12	12	4.66667	-67.6667	5.66667	6	-14.3333	-5.66667
C	2057	C2057	23	M		24	24	-4.66667	77	8.33333	14.6667	8.33333	-1.66667
C	2058	C2058	20	F		1	1	-37.6667	209.667	17.3333	13.6667	54.3333	20.6667
C	2058	C2058	20	F		2	2	10.6667	-94.3333	-1.33333	-5.33333	-25.3333	-9.66667
C	2058	C2058	20	F		3	3	-3.33333	33.6667	3.66667	-0.666667	9	5.66667
C	2058	C2058	20	F		12	12	-5.33333	42.6667	-2	4.33333	5	-0.333333
C	2058	C2058	20	F		24	24	-27.6667	288	6.66667	7.66667	43.6667	-0.333333
D	1001	D1001	31	F	1 hour postdose	1	1	5.11111	-49	-6	-0.333333	2.66667	7.55556
D	1001	D1001	31	F	2 hours postdose	2	2	7.33333	-75.6667	-10	-0.888889	-2.33333	4.44444
D	1001	D1001	31	F	3 hours postdose	3	3	9.77778	-100.444	-6.44444	-0.888889	-3.44444	-0.888889
D	1001	D1001	31	F	12 hours postdose	12	12	-4	22.1111	14	0.888889	-10.6667	11.5556
D	1001	D1001	31	F	24 hours postdose	24	24	-3.11111	20.3333	9.33333	4.88889	-0.333333	26.1111
D	1002	D1002	40	F	1 hour postdose	1	1	-1.33333	21.2222	-24.5556	6.22222	35.3333	26.4444
D	1002	D1002	40	F	2 hours postdose	2	2	-7.44444	146.889	-17.4444	6.66667	46.6667	27
D	1002	D1002	40	F	3 hours postdose	3	3	-2.88889	58.1111	-6.33333	1.33333	36.8889	23.8889
D	1002	D1002	40	F	12 hours postdose	12	12	-2.36848e-15	14.1111	-8.77778	3.33333	-1.66667	12.3333
D	1002	D1002	40	F	24 hours postdose	24	24	1.77778	-28.6667	-4.22222	2.77778	-1	-2.66667
D	1003	D1003	35	F	1 hour postdose	1	1	-2.66667	23.2222	2	-4.55556	4.44444	9.77778
D	1003	D1003	35	F	2 hours postdose	2	2	-2.55556	23.5556	-3.22222	-6.88889	-0.666667	2.44444
D	1003	D1003	35	F	3 hours postdose	3	3	-0.888889	3.11111	-1.66667	-6.11111	4	6.77778
D	1003	D1003	35	F	12 hours postdose	12	12	-0.333333	-5	5.44444	-6.44444	-18.8889	-3.33333
D	1003	D1003	35	F	24 hours postdose	24	24	1.55556	-17.7778	5.55556	-3.66667	-7.33333	-0.888889
D	1004	D1004	43	F	1 hour postdose	1	1	3.88889	-82.1111	-2.44444	-3.55556	-0.444444	21.5556
D	1004	D1004	43	F	2 hours postdose	2	2	4.11111	-91.6667	-3	-2	4.11111	17
D	1004	D1004	43	F	3 hours postdose	3	3	2.11111	-37.5556	1.33333	0.777778	7.11111	13.1111
D	1004	D1004	43	F	12 hours postdose	12	12	6	-101.778	-6.77778	-0.444444	-33.4444	2.22222
D	1004	D1004	43	F	24 hours postdose	24	24	5.66667	-106.778	-3.22222	-3.55556	-18.8889	-8.33333
D	1005	D1005	44	F	1 hour postdose	1	1	5	-52.6667	-5.11111	-5.44444	7.55556	3.44444
D	1005	D1005	44	F	2 hours postdose	2	2	2.55556	-28.8889	-2.55556	-2.44444	0.222222	-8.33333
D	1005	D1005	44	F	3 hours postdose	3	3	-1.22222	23.5556	-4.55556	-1.22222	9.55556	-1.77778
D	1005	D1005	44	F	12 hours postdose	12	12	-7.33333	82.6667	6.33333	-5.33333	-1.22222	9.77778
D	1005	D1005	44	F	24 hours postdose	24	24	0.333333	-8	-0.222222	-2.55556	-8.66667	-5.11111
D	1006	D1006	29	F	1 hour postdose	1	1	9.66667	-135.111	-3.22222	-2.77778	-1.33333	17.8889
D	1006	D1006	29	F	2 hours postdose	2	2	8	-95	-2	0.666667	26.3333	24.7778
D	1006	D1006	29	F	3 hours postdose	3	3	7.77778	-71.7778	0.111111	-2.77778	30.5556	17.3333
D	1006	D1006	29	F	12 hours postdose	12	12	16	-232	-2.33333	-1.77778	-24.1111	-2.44444
D	1006	D1006	29	F	24 hours postdose	24	24	12.8889	-180.556	-2.66667	-1	3.22222	2.11111
D	1007	D1007	23	F	1 hour postdose	1	1	5.88889	-70.7778	-10.1111	-1.66667	11.4444	-1.44444
D	1007	D1007	23	F	2 hours postdose	2	2	-0.111111	5.77778	-2.55556	0.888889	22.1111	18.3333
D	1007	D1007	23	F	3 hours postdose	3	3	5	-68	-7	1	23.7778	16.5556
D	1007	D1007	23	F	12 hours postdose	12	12	3.66667	-43.8889	-2.11111	1.44444	-5.44444	8.11111
D	1007	D1007	23	F	24 hours postdose	24	24	2.22222	-39.3333	-7.44444	0	-12.7778	4.66667
D	1008	D1008	29	F	1 hour postdose	1	1	6.44444	-86.5556	11.6667	-15.8889	-5.33333	-18
D	1008	D1008	29	F	2 hours postdose	2	2	0.888889	-15.3333	9.4739e-15	-7.55556	4.88889	-3.66667
D	1008	D1008	29	F	3 hours postdose	3	3	2.77778	-34.8889	13	-3.33333	3.55556	-8.88889
D	1008	D1008	29	F	12 hours postdose	12	12	-1.55556	16.4444	4.11111	-8.66667	-10.1111	-12.8889
D	1008	D1008	29	F	24 hours postdose	24	24	-9.88889	97.6667	14.3333	-22.6667	-8	-13
D	1009	D1009	33	F	1 hour postdose	1	1	5	-81.8889	-6.33333	-2.88889	11.8889	17.5556
D	1009	D1009	33	F	2 hours postdose	2	2	9.33333	-146.444	-6.44444	-3	19	29.8889
D	1009	D1009	33	F	3 hours postdose	3	3	3.77778	-46.3333	-6.44444	1.88889	27.3333	23.7778
D	1009	D1009	33	F	12 hours postdose	12	12	-2.11111	37.7778	7.55556	3.22222	10	13.5556
D	1009	D1009	33	F	24 hours postdose	24	24	8.88889	-145.556	-1.11111	0.777778	1.55556	14.2222
D	1010	D1010	27	F	1 hour postdose	1	1	0.555556	-3	-7.22222	2.11111	11	18.1111
D	1010	D1010	27	F	2 hours postdose	2	2	-2.77778	29.1111	-4.22222	2.66667	4	13.7778
D	1010	D1010	27	F	3 hours postdose	3	3	2.77778	-27.3333	-1.11111	-3.88889	0.666667	19.1111
D	1010	D1010	27	F	12 hours postdose	12	12	-5.66667	62.8889	-6.22222	2.11111	-15.6667	21.8889
D	1010	D1010	27	F	24 hours postdose	24	24	-2.88889	38.8889	-4.33333	2.11111	-3.11111	8.77778
D	1011	D1011	39	F	1 hour postdose	1	1	0.888889	-18.2222	9	0.666667	34	26.5556
D	1011	D1011	39	F	2 hours postdose	2	2	1.66667	-43.2222	8.22222	2.22222	36.7778	30.4444
D	1011	D1011	39	F	3 hours postdose	3	3	2.11111	-44.4444	-1	2.77778	34.5556	26.4444
D	1011	D1011	39	F	12 hours postdose	12	12	7.55556	-95.4444	4.55556	-0.222222	-3.22222	10.6667
D	1011	D1011	39	F	24 hours postdose	24	24	1.44444	-17.3333	20.8889	0.888889	34.8889	40.1111
D	1012	D1012	46	F	1 hour postdose	1	1	5.11111	-67.4444	-0.777778	-5.22222	7.66667	9.66667
D	1012	D1012	46	F	2 hours postdose	2	2	1.11111	-15.5556	0.555556	-2.77778	18.6667	8.44444
D	1012	D1012	46	F	3 hours postdose	3	3	-4.33333	41.7778	0.222222	-0.777778	22.6667	2.88889
D	1012	D1012	46	F	12 hours postdose	12	12	8.22222	-89.5556	-13.3333	-2.77778	-4.66667	7.88889
D	1012	D1012	46	F	24 hours postdose	24	24	8.33333	-100.222	-15.4444	-0.555556	4.73695e-15	5.22222
D	1013	D1013	37	M	1 hour postdose	1	1	4.88889	-70.4444	6.77778	0.555556	9.44444	15.8889
D	1013	D1013	37	M	2 hours postdose	2	2	0.777778	-15.7778	3.44444	2.44444	10.4444	14.4444
D	1013	D1013	37	M	3 hours postdose	3	3	1.55556	-31.1111	0.444444	2	15.6667	22.3333
D	1013	D1013	37	M	12 hours postdose	12	12	3.88889	-63.2222	7.77778	1	11.1111	9.88889
D	1013	D1013	37	M	24 hours postdose	24	24	-3.55556	51.2222	8.77778	2.33333	25.2222	11
D	1014	D1014	31	M	1 hour postdose	1	1	7.55556	-162.444	6.22222	3	-1.11111	16.3333
D	1014	D1014	31	M	2 hours postdose	2	2	1.77778	-40.4444	8.66667	-0.666667	3.66667	19.2222
D	1014	D1014	31	M	3 hours postdose	3	3	1.33333	-22.6667	6.66667	3.11111	6.77778	18.1111
D	1014	D1014	31	M	12 hours postdose	12	12	4	-84.5556	1.11111	4.33333	-2.33333	25.8889
D	1014	D1014	31	M	24 hours postdose	24	24	-7.88889	100.333	-2.22222	13.5556	20	15.2222
D	1015	D1015	22	M	1 hour postdose	1	1	10.8889	-171.889	-11.2222	-8.77778	-18	7.55556
D	1015	D1015	22	M	2 hours postdose	2	2	3.77778	-65.4444	4.44444	1.77778	2.22222	9.55556
D	1015	D1015	22	M	3 hours postdose	3	3	3.66667	-56	6	0.777778	6.66667	9.88889
D	1015	D1015	22	M	12 hours postdose	12	12	4.88889	-82.5556	3.77778	-5.66667	-12.7778	0
D	1015	D1015	22	M	24 hours postdose	24	24	4.11111	-71.8889	3.33333	1.44444	9	25.5556
D	1016	D1016	46	M	1 hour postdose	1	1	-3.33333	43.6667	-2	1.44444	-2.66667	-6
D	1016	D1016	46	M	2 hours postdose	2	2	2.33333	-44.3333	-6.77778	1.22222	-8	4
D	1016	D1016	46	M	3 hours postdose	3	3	-4.11111	80.4444	-1.88889	2.11111	-0.888889	-6.66667
D	1016	D1016	46	M	12 hours postdose	12	12	1.44444	-36.5556	0.888889	2.33333	-21.6667	4.11111
D	1016	D1016	46	M	24 hours postdose	24	24	6.33333	-158.333	-5.22222	1.44444	-10.2222	14.3333
D	1017	D1017	22	M	1 hour postdose	1	1	8.88889	-136.556	5.22222	4	0.888889	7.11111
D	1017	D1017	22	M	2 hours postdose	2	2	4.44444	-74.7778	-0.333333	0.222222	3	8.66667
D	1017	D1017	22	M	3 hours postdose	3	3	9.66667	-166.556	-2.77778	2.33333	3.22222	6.11111
D	1017	D1017	22	M	12 hours postdose	12	12	7	-105.111	3.11111	3.88889	-10	15.7778
D	1017	D1017	22	M	24 hours postdose	24	24	-0.111111	16.8889	4.77778	1.66667	11.6667	-0.444444
D	1018	D1018	22	M	1 hour postdose	1	1	6.22222	-112.444	-19.3333	2.44444	-6.55556	18.5556
D	1018	D1018	22	M	2 hours postdose	2	2	-0.555556	1.88889	4.33333	3.11111	9.22222	28.1111
D	1018	D1018	22	M	3 hours postdose	3	3	3.66667	-75.7778	-12.2222	3.11111	6.44444	27.8889
D	1018	D1018	22	M	12 hours postdose	12	12	3.33333	-61.7778	-16.1111	0.444444	-12	14.3333
D	1018	D1018	22	M	24 hours postdose	24	24	7.44444	-144.222	-17.1111	4.88889	-0.222222	16.1111
D	1019	D1019	34	M	1 hour postdose	1	1	-1	8.44444	-11.6667	-2.55556	5.11111	-12.8889
D	1019	D1019	34	M	2 hours postdose	2	2	4.44444	-77.7778	-10.8889	6.77778	26.5556	4.88889
D	1019	D1019	34	M	3 hours postdose	3	3	3.22222	-52	-12.2222	7	24.8889	4
D	1019	D1019	34	M	12 hours postdose	12	12	4	-62.4444	-17.2222	6.66667	22.5556	10
D	1019	D1019	34	M	24 hours postdose	24	24	-3.22222	49.1111	-8	4.11111	24.2222	7
D	1020	D1020	38	M	1 hour postdose	1	1	-0.555556	1.77778	-2.22222	0.555556	5.55556	-11.3333
D	1020	D1020	38	M	2 hours postdose	2	2	-1.22222	21.2222	-1.77778	0.111111	12.2222	-8.55556
D	1020	D1020	38	M	3 hours postdose	3	3	-3.88889	86.5556	-5.55556	1.88889	24.4444	1.88889
D	1020	D1020	38	M	12 hours postdose	12	12	-8.66667	167.667	3.88889	1.11111	13.1111	22
D	1020	D1020	38	M	24 hours postdose	24	24	-4.44444	97.3333	-6.88889	-0.222222	2.66667	10.6667
D	1021	D1021	41	M	1 hour postdose	1	1	5.33333	-69.2222	-3	-2.55556	10.2222	10
D	1021	D1021	41	M	2 hours postdose	2	2	0.222222	-3.22222	6.77778	0.222222	17.1111	7.44444
D	1021	D1021	41	M	3 hours postdose	3	3	1.33333	-14.2222	-1.55556	2.88889	24.3333	17.7778
D	1021	D1021	41	M	12 hours postdose	12	12	8	-114.889	1.44444	2	8.22222	2.22222
D	1021	D1021	41	M	24 hours postdose	24	24	0.444444	-13.2222	2.55556	0.888889	19.1111	7.66667
D	1022	D1022	38	M	1 hour postdose	1	1	1.77778	-13.2222	2.77778	0.222222	8.44444	4.22222
D	1022	D1022	38	M	2 hours postdose	2	2	7.66667	-87.8889	-4.55556	-1	12.8889	21.1111
D	1022	D1022	38	M	3 hours postdose	3	3	0.555556	13.4444	-6.44444	0.444444	19.5556	3.88889
D	1022	D1022	38	M	12 hours postdose	12	12	8.44444	-100.444	6.33333	-1.77778	-16.2222	-0.888889
D	1022	D1022	38	M	24 hours postdose	24	24	3.66667	-28.4444	-5.66667	1.77778	6.77778	8.22222
D	1023	D1023	47	M	1 hour postdose	1	1	1.66667	-15.8889	-8.33333	-7.11111	1.66667	9.77778
D	1023	D1023	47	M	2 hours postdose	2	2	-0.555556	35.5556	-2.11111	-7	8.22222	7.33333
D	1023	D1023	47	M	3 hours postdose	3	3	0.444444	-0.111111	-0.555556	-1.77778	8.33333	14.2222
D	1023	D1023	47	M	12 hours postdose	12	12	2.33333	-18.5556	-1.88889	-3.88889	-11.2222	21.3333
D	1023	D1023	47	M	24 hours postdose	24	24	-2.33333	54.3333	6.22222	-1.88889	11.2222	21
D	1024	D1024	27	M	1 hour postdose	1	1	8	-125.111	-1.89478e-14	0.888889	-9.11111	17.3333
D	1024	D1024	27	M	2 hours postdose	2	2	8.22222	-129.333	2.44444	0.777778	-1.44444	27
D	1024	D1024	27	M	3 hours postdose	3	3	6	-89.3333	-6.44444	1.22222	-0.444444	16.1111
D	1024	D1024	27	M	12 hours postdose	12	12	2.22222	-24.7778	-14.2222	-1	10.2222	2.88889
D	1024	D1024	27	M	24 hours postdose	24	24	0.777778	4.55556	-9	0.888889	-3.77778	5.22222
D	1025	D1025	48	M	1 hour postdose	1	1	0.111111	-6.22222	-3.66667	3.66667	11	19
D	1025	D1025	48	M	2 hours postdose	2	2	-1	20.5556	-6.33333	3.44444	21.2222	18.6667
D	1025	D1025	48	M	3 hours postdose	3	3	4	-69.7778	-9.33333	4	19.6667	14.8889
D	1025	D1025	48	M	12 hours postdose	12	12	1.44444	-19.7778	-2.88889	2.77778	-6.66667	21.1111
D	1025	D1025	48	M	24 hours postdose	24	24	5.44444	-84.2222	-5.33333	-0.666667	-1.11111	10.6667
D	1026	D1026	47	M	1 hour postdose	1	1	3.33333	-57.3333	-25	-7.55556	-2.77778	11.3333
D	1026	D1026	47	M	2 hours postdose	2	2	2.11111	-34.5556	-32.5556	-6.55556	4.55556	5.77778
D	1026	D1026	47	M	3 hours postdose	3	3	2.77778	-53	-35.4444	-10.7778	-1.44444	14.8889
D	1026	D1026	47	M	12 hours postdose	12	12	4.44444	-84.4444	-36.4444	-12.8889	-42.2222	-13.2222
D	1026	D1026	47	M	24 hours postdose	24	24	3.33333	-53.4444	-35.8889	-6.22222	-11.7778	9.33333
D	1027	D1027	38	M	1 hour postdose	1	1	3.88889	-52.6667	-21.5556	-5.66667	6.77778	15.8889
D	1027	D1027	38	M	2 hours postdose	2	2	6	-72.6667	-33.6667	-8.11111	1.11111	10.3333
D	1027	D1027	38	M	3 hours postdose	3	3	4.44444	-78	-28.7778	-11.5556	10.6667	6.33333
D	1027	D1027	38	M	12 hours postdose	12	12	12.8889	-193.333	-12.4444	-14.5556	-5	21
D	1027	D1027	38	M	24 hours postdose	24	24	3.88889	-72	-6	-6	-5.33333	5.77778
D	1028	D1028	45	M	1 hour postdose	1	1	-6.33333	112.444	-8.11111	16.1111	13.8889	-1.22222
D	1028	D1028	45	M	2 hours postdose	2	2	4.11111	-93.1111	-5.22222	11.2222	14.1111	23.2222
D	1028	D1028	45	M	3 hours postdose	3	3	0.666667	-22	-12.3333	17.7778	22.6667	23.2222
D	1028	D1028	45	M	12 hours postdose	12	12	-0.444444	-3.88889	-3	4.88889	-17.1111	17
D	1028	D1028	45	M	24 hours postdose	24	24	-1.22222	15.5556	-3.77778	13.8889	14.4444	13.2222
D	1029	D1029	21	M	1 hour postdose	1	1	20.3333	-381.111	9.4739e-15	-2.44444	-45.1111	-13.7778
D	1029	D1029	21	M	2 hours postdose	2	2	14.8889	-295.889	4.77778	-4	-36.1111	-6.11111
D	1029	D1029	21	M	3 hours postdose	3	3	6.88889	-165.111	11.3333	-2.33333	-34.4444	-2
D	1029	D1029	21	M	12 hours postdose	12	12	6.22222	-175.556	6.88889	-7	-47.4444	-15.2222
D	1029	D1029	21	M	24 hours postdose	24	24	8.33333	-189.889	-0.111111	1.88889	-31	-6.66667
D	1030	D1030	20	M	1 hour postdose	1	1	-8.77778	141.222	13.5556	4.77778	5.55556	22.1111
D	1030	D1030	20	M	2 hours postdose	2	2	-1.77778	77.1111	10.6667	3.11111	0.111111	7
D	1030	D1030	20	M	3 hours postdose	3	3	-8.44444	146.667	9.66667	5.33333	13.6667	28.4444
D	1030	D1030	20	M	12 hours postdose	12	12	-14.7778	245.556	10.8889	3.22222	4.22222	8.11111
D	1030	D1030	20	M	24 hours postdose	24	24	-6.44444	120	9.33333	5.44444	20.1111	10.7778
D	1031	D1031	39	M	1 hour postdose	1	1	7.77778	-155.667	3.44444	-7.66667	6	21.4444
D	1031	D1031	39	M	2 hours postdose	2	2	5.44444	-99.7778	1.33333	-7.55556	12.1111	16.4444
D	1031	D1031	39	M	3 hours postdose	3	3	8.44444	-168.111	-8.77778	-5.22222	10.8889	41.1111
D	1031	D1031	39	M	12 hours postdose	12	12	18	-302.111	-4.77778	-4.11111	-25.4444	22.3333
D	1031	D1031	39	M	24 hours postdose	24	24	3.66667	-68.3333	6	-6.11111	-6.55556	12
D	1032	D1032	36	M	1 hour postdose	1	1	5.55556	-120.778	-5.44444	2.22222	21.2222	28.2222
D	1032	D1032	36	M	2 hours postdose	2	2	8.55556	-179.556	6.44444	-0.222222	26.7778	22.3333
D	1032	D1032	36	M	3 hours postdose	3	3	9.11111	-188.556	7.77778	2.66667	26.6667	23.3333
D	1032	D1032	36	M	12 hours postdose	12	12	2.33333	-70.2222	4.33333	-10	0.555556	44.1111
D	1032	D1032	36	M	24 hours postdose	24	24	3	-61.6667	11.5556	-2.77778	5	25
D	1033	D1033	50	M	1 hour postdose	1	1	-3.66667	30.5556	6.66667	-0.777778	32.2222	3.33333
D	1033	D1033	50	M	2 hours postdose	2	2	-4.22222	47.5556	2.22222	4.73695e-15	43.4444	12.2222
D	1033	D1033	50	M	3 hours postdose	3	3	-7.88889	116.778	5.77778	0.111111	45.2222	3.11111
D	1033	D1033	50	M	12 hours postdose	12	12	-5.77778	75	-2.11111	-4.44444	20.6667	2.22222
D	1033	D1033	50	M	24 hours postdose	24	24	0	-7.22222	2.44444	2.88889	21.5556	13.6667
D	1034	D1034	25	M	1 hour postdose	1	1	8.66667	-147.889	-3.88889	-2.11111	-7	25.1111
D	1034	D1034	25	M	2 hours postdose	2	2	5.11111	-66.2222	8.66667	-1.77778	-4.66667	30
D	1034	D1034	25	M	3 hours postdose	3	3	3	-45.2222	6.11111	2.22222	-6.55556	20.7778
D	1034	D1034	25	M	12 hours postdose	12	12	-3.22222	26.1111	4.22222	4.73695e-15	-22.1111	27.6667
D	1034	D1034	25	M	24 hours postdose	24	24	4.44444	-50.3333	19.6667	-1.33333	-12.7778	32.3333
D	1035	D1035	50	M	1 hour postdose	1	1	-2.33333	34.3333	1.88889	1	22.6667	18.6667
D	1035	D1035	50	M	2 hours postdose	2	2	1.66667	-35.5556	5.44444	0.111111	23.3333	15.2222
D	1035	D1035	50	M	3 hours postdose	3	3	-6	105.667	4.77778	-0.222222	40.3333	19.8889
D	1035	D1035	50	M	12 hours postdose	12	12	0.111111	30.7778	4.88889	-5.55556	-17.1111	5.55556
D	1035	D1035	50	M	24 hours postdose	24	24	-10.3333	157.111	4.77778	-2.55556	10.1111	8.77778
D	1036	D1036	30	M	1 hour postdose	1	1	7.77778	-165.444	7.22222	-9.4739e-15	-12.4444	5.22222
D	1036	D1036	30	M	2 hours postdose	2	2	0.666667	-14.6667	-0.555556	0.777778	0.111111	1
D	1036	D1036	30	M	3 hours postdose	3	3	5.33333	-134.333	1.44444	0.111111	-3.11111	8.44444
D	1036	D1036	30	M	12 hours postdose	12	12	3.55556	-79.1111	4.33333	2.66667	-18.4444	4
D	1036	D1036	30	M	24 hours postdose	24	24	0.444444	-10.3333	5.11111	-0.777778	-8.44444	6
D	1037	D1037	52	F	1 hour postdose	1	1	4.88889	-118.333	-12.5556	3.77778	0.777778	19.8889
D	1037	D1037	52	F	2 hours postdose	2	2	9.66667	-231	-5.11111	1.44444	5.55556	35.1111
D	1037	D1037	52	F	3 hours postdose	3	3	2.11111	-62.7778	-11.6667	0.333333	12.8889	21.8889
D	1037	D1037	52	F	12 hours postdose	12	12	7.11111	-176.889	-13.2222	4.66667	-15.2222	14.2222
D	1037	D1037	52	F	24 hours postdose	24	24	1.22222	-45.6667	-14.5556	2.44444	-0.555556	6.88889
D	1038	D1038	37	F	1 hour postdose	1	1	8.33333	-136	-8.88889	-2.77778	-1	9.44444
D	1038	D1038	37	F	2 hours postdose	2	2	8.22222	-157.667	-3.66667	-5.44444	1.55556	22.4444
D	1038	D1038	37	F	3 hours postdose	3	3	6.22222	-115.222	0.111111	-5.88889	1.77778	12.7778
D	1038	D1038	37	F	12 hours postdose	12	12	-2.55556	30.4444	-5.33333	-2.33333	-8	6.44444
D	1038	D1038	37	F	24 hours postdose	24	24	0.666667	5.66667	4.66667	-3	-7.11111	-3.44444
D	1039	D1039	54	F	1 hour postdose	1	1	2.33333	-27.6667	-6.77778	0.111111	10.8889	-0.888889
D	1039	D1039	54	F	2 hours postdose	2	2	1	-4.55556	-3.33333	0.555556	22.3333	14.5556
D	1039	D1039	54	F	3 hours postdose	3	3	-1.22222	23.7778	1	1.44444	32.2222	18
D	1039	D1039	54	F	12 hours postdose	12	12	-0.444444	11.2222	11.3333	-0.333333	-0.777778	2.44444
D	1039	D1039	54	F	24 hours postdose	24	24	-19.5556	226.889	-2.33333	2.22222	26.1111	11.7778
D	1040	D1040	32	F	1 hour postdose	1	1	6.55556	-69.1111	1.33333	-4.11111	-4.11111	7
D	1040	D1040	32	F	2 hours postdose	2	2	5.77778	-63.3333	0.333333	-1.33333	6.66667	14.4444
D	1040	D1040	32	F	3 hours postdose	3	3	4.33333	-49.5556	8.77778	-2.55556	7.55556	14.4444
D	1040	D1040	32	F	12 hours postdose	12	12	7.33333	-88.1111	2.44444	-8.11111	-19.2222	12.2222
D	1040	D1040	32	F	24 hours postdose	24	24	7.33333	-82.8889	6	-4.66667	-14.2222	2.44444
D	1041	D1041	33	F	1 hour postdose	1	1	-5.66667	63	1.33333	-2.66667	10.2222	10.2222
D	1041	D1041	33	F	2 hours postdose	2	2	-3.55556	30.6667	3.44444	-0.444444	10.5556	7.88889
D	1041	D1041	33	F	3 hours postdose	3	3	-4.11111	33.7778	6.88889	-1.88889	12.3333	21.2222
D	1041	D1041	33	F	12 hours postdose	12	12	-3.33333	4.66667	13.1111	-4.88889	-28	-2.55556
D	1041	D1041	33	F	24 hours postdose	24	24	-0.222222	-16	1.33333	5.11111	-7.11111	-12.6667
D	1042	D1042	24	F	1 hour postdose	1	1	9.44444	-131.111	-13.6667	0.222222	-12.8889	-8
D	1042	D1042	24	F	2 hours postdose	2	2	12.3333	-160.778	-9.77778	-0.444444	-7.66667	-1.55556
D	1042	D1042	24	F	3 hours postdose	3	3	16.6667	-251.111	-7.77778	-2.33333	0.222222	2.44444
D	1042	D1042	24	F	12 hours postdose	12	12	14.8889	-210.778	-9.22222	-5.44444	-31.8889	-3.66667
D	1042	D1042	24	F	24 hours postdose	24	24	15.8889	-212.222	-14	0.222222	-38.4444	7.33333
D	1043	D1043	40	F	1 hour postdose	1	1	13.6667	-156.556	20.5556	-2.77778	1.11111	19.1111
D	1043	D1043	40	F	2 hours postdose	2	2	4.11111	-56.1111	4.55556	-0.555556	24.3333	21.5556
D	1043	D1043	40	F	3 hours postdose	3	3	11.5556	-128.333	15.6667	-9.4739e-15	8.33333	16.7778
D	1043	D1043	40	F	12 hours postdose	12	12	14.7778	-144.889	7.22222	-5.66667	-31.8889	7.22222
D	1043	D1043	40	F	24 hours postdose	24	24	7.22222	-64.4444	3.88889	-2.11111	-22.1111	7
D	1044	D1044	34	F	1 hour postdose	1	1	6.22222	-64.4444	-6.11111	-1.44444	-6.11111	-18.2222
D	1044	D1044	34	F	2 hours postdose	2	2	4.77778	-46.6667	-8.33333	1.44444	9.44444	-8.66667
D	1044	D1044	34	F	3 hours postdose	3	3	2.66667	-16.8889	-11.3333	-2.33333	8	-14
D	1044	D1044	34	F	12 hours postdose	12	12	3.66667	-42.5556	1.77778	-4.55556	-13.8889	-26.2222
D	1044	D1044	34	F	24 hours postdose	24	24	6.66667	-67	1.88889	-0.666667	-1.33333	1.66667
D	1045	D1045	29	F	1 hour postdose	1	1	15.3333	-208.222	4.22222	1.55556	-3.88889	-3.33333
D	1045	D1045	29	F	2 hours postdose	2	2	14.8889	-207.889	-3.88889	0.555556	-7.55556	5.66667
D	1045	D1045	29	F	3 hours postdose	3	3	14.7778	-209.333	-5.33333	-2.55556	-7.44444	-6.88889
D	1045	D1045	29	F	12 hours postdose	12	12	6.44444	-83.8889	11.1111	5.55556	-10.2222	-1.66667
D	1045	D1045	29	F	24 hours postdose	24	24	4.22222	-56.8889	-0.666667	-1.77778	-7.33333	-12.8889
D	1046	D1046	31	F	1 hour postdose	1	1	-3.88889	61.7778	-31.6667	-2.11111	3.22222	-2.44444
D	1046	D1046	31	F	2 hours postdose	2	2	1.22222	-19.5556	-11.3333	0.333333	-5.44444	-7.77778
D	1046	D1046	31	F	3 hours postdose	3	3	-5.55556	89.4444	-22.6667	0.333333	2	-7.77778
D	1046	D1046	31	F	12 hours postdose	12	12	7.66667	-93	-13.4444	-1.22222	-28.3333	0.222222
D	1046	D1046	31	F	24 hours postdose	24	24	11	-124.111		1.22222	-38.6667	-24.7778
D	1047	D1047	42	F	1 hour postdose	1	1	11.3333	-177.222	3.11111	3	10.3333	17.1111
D	1047	D1047	42	F	2 hours postdose	2	2	5.33333	-67.8889	11.6667	-0.444444	8.66667	6.11111
D	1047	D1047	42	F	3 hours postdose	3	3	0.666667	43.7778	9.22222	0.888889	28.8889	-1.88889
D	1047	D1047	42	F	12 hours postdose	12	12	5.55556	-65.8889	4.22222	2.88889	-21.4444	2.88889
D	1047	D1047	42	F	24 hours postdose	24	24	1.33333	-10.2222	11	6.33333	-3.55556	-14.8889
D	1048	D1048	23	F	1 hour postdose	1	1	9.55556	-141.333	-4.77778	1.66667	0.777778	6.88889
D	1048	D1048	23	F	2 hours postdose	2	2	15.3333	-219.556	3.33333	3.66667	-0.111111	10.1111
D	1048	D1048	23	F	3 hours postdose	3	3	16.8889	-241.333	1	4.22222	2	10.7778
D	1048	D1048	23	F	12 hours postdose	12	12	18.6667	-251.111	2.11111	1.88889	-20.3333	6.66667
D	1048	D1048	23	F	24 hours postdose	24	24	4.66667	-77	5.22222	0.333333	-3.77778	5.88889
E	2001	E2001	28	M		1	1	-4.33	57.33	0	-1.66	2.66	-5.66
E	2001	E2001	28	M		2	2	0.34	-1.67	-2	-2.67	6	6
E	2001	E2001	28	M		3	3	-11.99	141.33	4.67	-1.34	17.66	-3
E	2001	E2001	28	M		12	12	7.34	-78	4	-1.34	-21.34	-10.66
E	2001	E2001	28	M		24	24	-4	49	12.67	0	-4.67	-12.66
E	2002	E2002	34	M		1	1	-1.01	11	5.01	-6.67	6.67	5.99
E	2002	E2002	34	M		2	2	0.33	-4.67	-5.99	-8.01	3.33	4.33
E	2002	E2002	34	M		3	3	-0.01	-17	-4.99	-4.67	3.34	4.99
E	2002	E2002	34	M		12	12	5.33	-85.34	0.67	-9.34	-2.33	8.99
E	2002	E2002	34	M		24	24	-11.01	171.67	-0.33	-3	17.33	-4.67
E	2003	E2003	44	M		1	1	2.66	-96.99	13	-8	0.34	10
E	2003	E2003	44	M		2	2	5.67	-162.33	15.67	-7	-5.67	12.66
E	2003	E2003	44	M		3	3	6.67	-190	12.01	-11.34	-5	15.66
E	2003	E2003	44	M		12	12	7.33	-205.66	0.33	-9.01	0	22
E	2003	E2003	44	M		24	24	6.67	-195	2	-5.67	-10.66	10.99
E	2004	E2004	34	M		1	1	-3	27.66	5.32	1.34	4	-0.33
E	2004	E2004	34	M		2	2	6.66	-114.67	0.66	0.67	-3.66	11
E	2004	E2004	34	M		3	3	0.33	-13.34	-3.67	5.67	3.34	4.67
E	2004	E2004	34	M		12	12	8.34	-148	-3.34	-3.33	-11.32	7
E	2004	E2004	34	M		24	24	2	-48.67	1.99	-1	-2.66	3
E	2005	E2005	27	M		1	1	7.67	-119	-2.33	0.67	9.01	25.66
E	2005	E2005	27	M		2	2	9.34	-171.67	-3.33	5.67	10	31.33
E	2005	E2005	27	M		3	3	4.67	-69.67	0.33	-1.34	9.34	19.34
E	2005	E2005	27	M		12	12	4.67	-61	-3.33	-1	9.67	19.34
E	2005	E2005	27	M		24	24	-4.33	89	-5	-5.34	0.68	-9
E	2006	E2006	24	M		1	1	-3	65	-4	1	5	-3.34
E	2006	E2006	24	M		2	2	-9.67	155.33	2	1.34	17.33	-5
E	2006	E2006	24	M		3	3	-8.99	115.66	-0.33	1.67	31.33	11.34
E	2006	E2006	24	M		12	12	-9.66	155.66	1.01	-1.32	15.67	-7
E	2006	E2006	24	M		24	24	-12.67	160.33	-0.66	2.34	13.34	-12.33
E	2007	E2007	29	M		1	1	13.66	-163.66	-2	-2.33	-19	7.33
E	2007	E2007	29	M		2	2	10.66	-113.66	-1	-0.67	5.67	25.66
E	2007	E2007	29	M		3	3	13.99	-171.67	-5.33	3	-6.67	20.99
E	2007	E2007	29	M		12	12	3	-23.66	0.01	-1.33	12.33	17.66
E	2007	E2007	29	M		24	24	3.33	-30	0	-3.33	-4.34	1
E	2008	E2008	30	M		1	1	-12.33	242.66	-12.67	3.33	28.33	-1.33
E	2008	E2008	30	M		2	2	-8.33	147	-0.99	-2	25	5.66
E	2008	E2008	30	M		3	3	-9	187.34	-7.66	-2	30.66	7.66
E	2008	E2008	30	M		12	12	-13	239.33	-3	3	32	1.67
E	2008	E2008	30	M		24	24	-14.67	255.33	-7.67	-0.67	43	10.33
E	2009	E2009	30	M		1	1	17	-231.01	-9	-2.33	-30.01	2.66
E	2009	E2009	30	M		2	2	8.67	-120.67	-16.33	4	1.33	18.33
E	2009	E2009	30	M		3	3	13.67	-211.33	-2.33	-3.66	-17	12.33
E	2009	E2009	30	M		12	12	11.66	-157.34	-13.33	-5.67	-17.33	4.33
E	2009	E2009	30	M		24	24	12.66	-188	-9	-6.66	-9.34	16.33
E	2010	E2010	48	M		1	1	9.33	-130.34	-12.01	-2.66	7.33	27.66
E	2010	E2010	48	M		2	2	11.67	-142.67	-12.67	-3.33	0.66	23.66
E	2010	E2010	48	M		3	3	1	-5	-20.67	-14.66	18	20
E	2010	E2010	48	M		12	12	5.67	-42.01	-18.33	-5.67	5.33	13.66
E	2010	E2010	48	M		24	24	-9	103.99	13	2.01	24.33	9.66
E	2011	E2011	55	M		1	1	17	-293.67	-1.33	1.99	-34.67	6.68
E	2011	E2011	55	M		2	2	6	-80.34	1.67	2.66	5.67	17.67
E	2011	E2011	55	M		3	3	12.67	-269.67	-3.33	3.66	-0.67	32.01
E	2011	E2011	55	M		12	12	4.33	-50.33	0.01	8.66	18	27.01
E	2011	E2011	55	M		24	24	4	-51	3.34	9.33	8	14.67
E	2012	E2012	22	M		1	1	11.67	-204.33	13.33	-3.67	-7	19.33
E	2012	E2012	22	M		2	2	12.33	-192.01	-8.33	-2.34	-30	-4.66
E	2012	E2012	22	M		3	3	2.33	-29	11	-1.34	5.01	8.33
E	2012	E2012	22	M		12	12	-0.01	-3	8.34	-0.67	5.01	5
E	2012	E2012	22	M		24	24	3	-43	9	-2	8.34	14
E	2013	E2013	29	F		1	1	-4.67	94.67	4.67	-8.33	21.32	8
E	2013	E2013	29	F		2	2	-3	66	-4	-0.67	13.33	4
E	2013	E2013	29	F		3	3	1	-17.67	0.33	-3.33	11.66	14
E	2013	E2013	29	F		12	12	-4.33	96	5	-10.66	18.33	5.66
E	2013	E2013	29	F		24	24	-1.34	36.33	6.67	-10.33	1.99	-2.33
E	2014	E2014	21	F		1	1	6.33	-75.67	1.34	7.34	-9.67	1.99
E	2014	E2014	21	F		2	2	0.67	1.66	-0.99	-1	10	10.66
E	2014	E2014	21	F		3	3	0.33	8.33	-7.33	0.34	13.66	13.99
E	2014	E2014	21	F		12	12	-5	66.33	1.34	0	8	-1
E	2014	E2014	21	F		24	24	-3	46	-0.33	2.34	19.33	13.33
E	2015	E2015	49	F		1	1	8.67	-192.68	-13.01	2	-11.68	12
E	2015	E2015	49	F		2	2	5.33	-125.34	-3.01	5.34	13.66	27.34
E	2015	E2015	49	F		3	3	5.33	-122.01	-9	2.67	14.33	27.67
E	2015	E2015	49	F		12	12	2.99	-70.34	0.99	1.67	1.33	9.66
E	2015	E2015	49	F		24	24	0.66	-26	0	10.67	10.99	13.66
E	2016	E2016	44	F		1	1	0.99	-23.66	2.66	5.67	10.67	14.33
E	2016	E2016	44	F		2	2	-0.01	-1.66	5.66	2.34	0.67	0.99
E	2016	E2016	44	F		3	3	-0.34	-1.99	0.32	1.33	13.67	14.33
E	2016	E2016	44	F		12	12	-4.68	49.67	0	-0.34	3	-4.01
E	2016	E2016	44	F		24	24	0.33	-2.67	4.99	4	3.67	4
E	2017	E2017	50	F		1	1	-1.34	14.34	4.66	7.99	10.33	8
E	2017	E2017	50	F		2	2	-4.67	60.34	-2.01	8.33	24	14.66
E	2017	E2017	50	F		3	3	-6.67	84.67	3.66	2.99	27.33	14.67
E	2017	E2017	50	F		12	12	-0.34	1.01	-0.34	0.32	13.33	13.33
E	2017	E2017	50	F		24	24	-4	47.01	0.66	7.66	13	5
E	2018	E2018	30	F		1	1	6	-80	20.66	-2	3	15.67
E	2018	E2018	30	F		2	2	5.33	-69	-10	-2.67	3.33	14.01
E	2018	E2018	30	F		3	3	5.33	-62	5	-4.67	2.67	12.67
E	2018	E2018	30	F		12	12	-1.67	30	2.66	-2.66	12	6.67
E	2018	E2018	30	F		24	24	2.67	-27.67	-5.34	-4.33	5	9.34
E	2019	E2019	20	F		1	1	-0.34	1.33	-7	1.01	20.67	20.67
E	2019	E2019	20	F		2	2	-0.34	20.99	-1.33	-0.66	38.01	37.67
E	2019	E2019	20	F		3	3	5	-91.01	-1.33	3.34	17.67	30
E	2019	E2019	20	F		12	12	-1.67	35.33	-14.67	1.01	15	11.99
E	2019	E2019	20	F		24	24	-5.34	93.66	-8.67	-0.66	35.67	23.33
E	2020	E2020	30	F		1	1	7.67	-95.34	-6.33	1.99	0	15.01
E	2020	E2020	30	F		2	2	4.34	-50	-4.33	1.99	7.34	15.01
E	2020	E2020	30	F		3	3	6.34	-83.01	-10.66	2.66	-4.33	8.01
E	2020	E2020	30	F		12	12	8.67	-101.67	-2.33	0.66	-5.33	11
E	2020	E2020	30	F		24	24	5	-62.67	-10.33	2.66	-9.67	-0.32
E	2021	E2021	35	F		1	1	-6	63.34	0.34	-4.66	22.67	13.33
E	2021	E2021	35	F		2	2	24.67	-129	-9.66	-3.99	-54.33	-36.01
E	2021	E2021	35	F		3	3	-4.67	49.68	2.67	-5.33	21.34	14.66
E	2021	E2021	35	F		12	12	5	-39.66	0	-4.33	0.33	8.66
E	2021	E2021	35	F		24	24	-3.33	29.34	4.34	-3.33	19.66	15.66
E	2022	E2022	35	F		1	1	-1.33	41.33	-11.33	2.99	21.34	16.34
E	2022	E2022	35	F		2	2	-11.67	171.67	-5.33	1.66	31.66	5.34
E	2022	E2022	35	F		3	3	-13.67	187.34	-4.99	9	32.33	3.01
E	2022	E2022	35	F		12	12	-19.66	262.67	-3.33	4.66	68.67	30.01
E	2023	E2023	35	F		1	1	0.33	-2.33	0.32	7.68	5	6
E	2023	E2023	35	F		2	2	13.33	-134	-3	5.67	-3.67	18.34
E	2023	E2023	35	F		3	3	0.67	-8.33	-3.34	2.67	7.33	9.33
E	2023	E2023	35	F		12	12	-3	29.33	-5.34	2.34	9.33	5.34
E	2023	E2023	35	F		24	24	-1.67	23.33	-5.34	4.01	-1.68	-5
E	2024	E2024	26	F		1	1	5.34	-126	-6.66	-1.67	-4.34	11.67
E	2024	E2024	26	F		2	2	4.34	-78.33	3.34	1	23	32.66
E	2024	E2024	26	F		3	3	1	14	6	0.33	5.67	5.66
E	2024	E2024	26	F		12	12	-4.33	124	6.67	2.67	46.67	31
E	2024	E2024	26	F		24	24	-7	162	19.67	-1.67	55.33	33.67
E	2025	E2025	20	F		1	1	0.99	-20	-9.01	2.33	8.66	12.01
E	2025	E2025	20	F		2	2	-12.67	159.34	-5.67	-0.33	33	9
E	2025	E2025	20	F		3	3	-7.33	91	-20.68	-3.34	32	19
E	2025	E2025	20	F		12	12	-3.67	50.01	-2.01	1.33	26.33	20.34
E	2025	E2025	20	F		24	24	-7.01	106	-3.34	0.33	23	8.67
E	2026	E2026	28	F		1	1	-4.32	56.34	0.33	2.67	9.33	1
E	2026	E2026	28	F		2	2	4.01	-80.33	-21.34	-0.67	3.33	13.34
E	2026	E2026	28	F		3	3	4.34	-78.99	-25.67	-0.34	5.66	16
E	2026	E2026	28	F		12	12	-0.32	2.34	-10.34	-1	-1.67	-2.33
E	2026	E2026	28	F		24	24	-6.66	105.34	-3.34	-2.01	21.33	7.33
E	2028	E2028	30	F		1	1	9	-160.66	9	-10.33	-17	5
E	2028	E2028	30	F		2	2	7.33	-124	4.33	-5.33	-1.99	16.33
E	2028	E2028	30	F		3	3	16.33	-251.66	5.67	-4.67	-33.33	4
E	2028	E2028	30	F		12	12	-6.34	70	-10.67	0.34	10.34	-1.33
E	2028	E2028	30	F		24	24	7.32	-136	9.34	3.01	-8.33	10.67
E	2029	E2029	21	F		1	1	7.33	-89.67	-15.66	2.01	-1.01	13
E	2029	E2029	21	F		2	2	5.67	-67.67	-22.34	-1.99	0.33	10.67
E	2029	E2029	21	F		3	3	11	-131.34	-18.33	0.33	-9	11.33
E	2029	E2029	21	F		12	12	11	-116.34	-13	-1	-2.01	17.67
E	2029	E2029	21	F		24	24	13.34	-160.01	-3	0.67	-13.67	11
E	2030	E2030	51	F		1	1	5	-136	5.33	-1.34	-2.34	13.33
E	2030	E2030	51	F		2	2	10.33	-274.34	2.33	-4.34	-5	27.99
E	2030	E2030	51	F		3	3	9.33	-235.66	-1	-3	3.66	31
E	2030	E2030	51	F		12	12	-0.67	-38	12.33	-2.67	7.67	10.33
E	2030	E2030	51	F		24	24	-2.67	34.66	4.33	-1.67	14	8
E	2031	E2031	51	M		1	1	-7	95.01	4.33	-1.67	15.67	1
E	2031	E2031	51	M		2	2	-12.66	180.67	15.33	-2	25.01	-2.33
E	2031	E2031	51	M		3	3	0	0.67	2.34	-2.34	9	9.33
E	2031	E2031	51	M		12	12	-2.67	35.34	7	-3.34	5.67	0
E	2031	E2031	51	M		24	24	1	-1.33	0	-3.01	8.33	8.66
E	2032	E2032	20	M		1	1	10	-224	-3.66	-1	-13.67	14.34
E	2032	E2032	20	M		2	2	18.67	-342.34	13.66	0.66	-22	24.34
E	2032	E2032	20	M		3	3	11.33	-219.68	7.67	-1.34	-12.33	17
E	2032	E2032	20	M		12	12	10	-199.67	4.66	-3.34	-12.34	13.34
E	2032	E2032	20	M		24	24	10.34	-210.34	2	1.33	-30	-2.33
E	2033	E2033	58	M		1	1	-0.66	4.33	-4	23.34	13.68	11.33
E	2033	E2033	58	M		2	2	-2	82	-1.33	25	26.67	16.33
E	2033	E2033	58	M		3	3	2	-65	-2.67	13.34	19.67	24
E	2033	E2033	58	M		12	12	4.66	-152.33	-24.66	0.01	0.34	15.34
E	2033	E2033	58	M		24	24	-1	31.67	-6.33	5.01	20	15
E	2034	E2034	23	M		1	1	-0.67	61.99	-4.33	-3.33	-1.34	-7.66
E	2034	E2034	23	M		2	2	2.66	19.99	1.34	-0.66	2.33	3.34
E	2034	E2034	23	M		3	3	9.33	-56.01	-5	-6.33	-11.67	0.01
E	2034	E2034	23	M		12	12	5	28.67	-3.66	4.67	-0.34	0.67
E	2034	E2034	23	M		24	24	-1.34	20.33	12.34	-2.66	3	-0.33
E	2035	E2035	25	M		1	1	-6.33	88.34	-9.34	1.01	10	-2.66
E	2035	E2035	25	M		2	2	0.67	-35.33	-12.67	2.67	-14.66	-11.33
E	2035	E2035	25	M		3	3	5	-106.99	-23.34	2.34	-7.33	6.01
E	2035	E2035	25	M		12	12	5.34	-101.99	-0.01	1	-18.34	-5.66
E	2035	E2035	25	M		24	24	12.33	-217.99	-6.01	-6	-31.34	-3.33
E	2036	E2036	31	M		1	1	6.01	-84	-7.66	4.66	-10.34	3
E	2036	E2036	31	M		2	2	12.33	-155.67	-6.99	-0.01	-13.33	11.67
E	2036	E2036	31	M		3	3	-7.33	51	1.01	-4.34	15.33	6.66
E	2036	E2036	31	M		12	12	-3.33	-9	-1.33	-1.67	-10.34	-11
E	2036	E2036	31	M		24	24	-3.33	23.66	-3.66	1.66	4.66	0.33
E	2037	E2037	36	M		1	1	5	-66.33	11.66	-3.33	-4.99	5.66
E	2037	E2037	36	M		2	2	-0.67	8.67	13.33	-3.67	4.01	2.66
E	2037	E2037	36	M		3	3	1	-5.67	6.33	-2	5.01	6.33
E	2037	E2037	36	M		12	12	0.67	-4.67	5	-9	6	7
E	2037	E2037	36	M		24	24	-2.67	35.33	4	-5.67	8.01	2.66
E	2038	E2038	39	M		1	1	-8.33	138.67	0.33	4.67	42.33	23.66
E	2038	E2038	39	M		2	2	-7.66	138.67	-1.66	1.33	35.67	17.33
E	2038	E2038	39	M		3	3	-4.33	82.67	-12.66	-1	17.33	6.33
E	2038	E2038	39	M		12	12	-2.66	54	-22.67	0.34	3.33	-3.67
E	2038	E2038	39	M		24	24	-2.32	41.34	-18.67	6.34	8	2.99
E	2039	E2039	27	M		1	1	-0.33	5.34	-0.67	-10.67	-9.68	-10.33
E	2039	E2039	27	M		2	2	3.67	-59	-1.34	-12.67	-8.01	-0.33
E	2039	E2039	27	M		3	3	-0.34	5.68	-1	-13.67	1.99	2.34
E	2039	E2039	27	M		12	12	5.34	-77.66	1.33	-12.67	-7	3.67
E	2039	E2039	27	M		24	24	-3.67	49.34	5	-12.67	-1.34	-7.67
E	2040	E2040	26	M		1	1	6.68	-126.67	-4.67	-7.34	-11.67	3.99
E	2040	E2040	26	M		2	2	8.67	-155	8	-11.67	0	18.99
E	2040	E2040	26	M		3	3	3.01	-49.67	-6.34	-4.34	8.33	14.33
E	2040	E2040	26	M		12	12	6.67	-128	-0.67	-4.67	-18.33	-2.68
E	2040	E2040	26	M		24	24	3.34	-48	-10	-7.67	2.33	8.33
E	2041	E2041	20	M		1	1	-1.67	32	-0.67	-4.67	5.66	1.33
E	2041	E2041	20	M		2	2	-4.67	106.67	2.66	-2	16.33	2.99
E	2041	E2041	20	M		3	3	5.66	-99.66	2.66	1	-3	10.66
E	2041	E2041	20	M		12	12	-2.34	74.68	6.66	-4.67	20.33	11.67
E	2041	E2041	20	M		24	24	4.66	-97.99	-2	1	2	14
E	2042	E2042	28	M		1	1	11.33	-159.33	-23.68	4	-7.67	16
E	2042	E2042	28	M		2	2	11	-187.66	-19	-1.01	-11.01	14.34
E	2042	E2042	28	M		3	3	2	-21.33	-23.34	0.66	-2.34	1.33
E	2042	E2042	28	M		12	12	12.33	-195.33	-32.34	-8.01	-24.34	2.33
E	2042	E2042	28	M		24	24	-6.34	89.01	-34	4.67	33	21.66
E	2043	E2043	22	M		1	1	15	-185.99	5	1	-19	6.67
E	2043	E2043	22	M		2	2	22	-264.33	9	0.33	-22.34	15
E	2043	E2043	22	M		3	3	11.67	-159.99	-8.33	3.67	-10	12.34
E	2043	E2043	22	M		12	12	10.67	-150.66	-10.34	2.33	-12	8.33
E	2043	E2043	22	M		24	24	17	-217.33	0.34	0	-17.67	13
E	2044	E2044	23	M		1	1	2	-48	3.66	-4.67	22.67	27.33
E	2044	E2044	23	M		2	2	6	-143.34	1.67	-6	4.67	19.67
E	2044	E2044	23	M		3	3	-14.68	190.66	8.66	1.66	32	6.34
E	2044	E2044	23	M		12	12	6.33	-117	1	2.34	5.33	19.34
E	2044	E2044	23	M		24	24	0.99	-30	6.67	-0.67	9.67	12.34
E	2045	E2045	31	M		1	1	-8.67	135.33	-29.66	-3	-3.67	-22.01
E	2045	E2045	31	M		2	2	-1.34	34.01	-27	-6.66	2.34	-0.67
E	2045	E2045	31	M		3	3	-6	99.33	-23.33	3.67	15.33	2.66
E	2045	E2045	31	M		12	12	-5.67	99.33	-27.66	-5	-1.66	-15
E	2045	E2045	31	M		24	24	-3.67	59.01	-22.66	-3.33	-0.66	-8.67
E	2046	E2046	28	M		1	1	-5.66	103.33	-8.01	4.99	19.67	6
E	2046	E2046	28	M		2	2	-7.33	142	-5.34	4.33	13.01	-4.33
E	2046	E2046	28	M		3	3	-7.32	133.67	-17.34	4.33	34.34	16.67
E	2046	E2046	28	M		12	12	-4.99	100	-9.67	-7.01	16.01	3.66
E	2046	E2046	28	M		24	24	-24.33	429	-16.01	1.33	65.34	10.66
E	2047	E2047	30	M		1	1	-3	54.67	8	-3.33	32.33	23.99
E	2047	E2047	30	M		2	2	-11.34	191.67	-0.33	0.67	23.66	-4.67
E	2047	E2047	30	M		3	3	-9.33	176.33	4.33	-0.66	36.33	12.33
E	2047	E2047	30	M		12	12	-5.34	122.67	-10	0	30.67	14.33
E	2047	E2047	30	M		24	24	-1	36.33	5.33	8.33	24	19.66
E	2048	E2048	28	M		1	1	-11.33	128.33	-2.34	9	41.67	20.33
E	2048	E2048	28	M		2	2	-2	28	2.33	4.67	12.34	7.66
E	2048	E2048	28	M		3	3	5.66	-112.34	-0.34	8.34	4.67	17.66
E	2048	E2048	28	M		12	12	3.34	-55.33	-7.33	5.67	12	18.33
E	2048	E2048	28	M		24	24	-9.34	188.66	-21.67	2.67	26.33	2.33
G	517002	G002	41	F		1	1	-0.444444	-14.1111	9	4.11111	3.44444	4.66667
G	517002	G002	41	F		2	2	1.88889	-38.1111	7	6.44444	-0.555556	4.66667
G	517002	G002	41	F		3	3	-0.444444	4.88889	11.6667	2.11111	1.77778	5.68434e-14
G	517002	G002	41	F		12	12	10.2222	-150.444	-2	-6.88889	-28.8889	-6.66667
G	517002	G002	41	F		24	24	6.22222	-111.444	7	3.11111	-23.2222	-8
G	517003	G003	19	F		1	1	3	-61.4444	-0.111111	2.33333	6.44444	15.3333
G	517003	G003	19	F		2	2	21.6667	-262.444	1.55556	1.33333	-25.8889	12.3333
G	517003	G003	19	F		3	3	16.3333	-206.111	15.5556	0	-23.5556	5.66667
G	517003	G003	19	F		12	12	0.666667	-75.7778	9.88889	5	1.11111	10
G	517003	G003	19	F		24	24	-3.33333	8.22222	-9.44444	0.333333	5.44444	2.66667
G	517005	G005	40	F		1	1	22.5556	-224.667	2.88889	0.666667	-43.5556	-7
G	517005	G005	40	F		2	2	16.8889	-168	4.88889	-0.333333	-32.2222	-4.33333
G	517005	G005	40	F		3	3	6.55556	-75	-3.77778	2.33333	-15.8889	-4
G	517005	G005	40	F		12	12	9.55556	-91.3333	1.88889	1.33333	-27.8889	-14
G	517005	G005	40	F		24	24	10.5556	-106.333	3.55556	0.333333	-32.8889	-17.3333
G	517006	G006	27	M		1	1	-3.11111	60.6667	-7.77778	6.22222	11.8889	3.33333
G	517006	G006	27	M		2	2	-10.4444	167.667	-8.11111	2.22222	17.5556	-5.33333
G	517006	G006	27	M		3	3	-6.11111	106	-12.7778	0.555556	18.8889	4.33333
G	517006	G006	27	M		12	12	-5.77778	71	-16.7778	0.222222	8.55556	-1.66667
G	517006	G006	27	M		24	24	1.22222	-30	2.22222	-9.77778	-0.111111	4
G	517007	G007	39	M		1	1	-7	112.556	1.11111	1.44444	26	9.88889
G	517007	G007	39	M		2	2	-8	140.222	7.77778	1.44444	21	1.22222
G	517007	G007	39	M		3	3	-11.3333	196.556	7.11111	-1.88889	33.3333	5.55556
G	517007	G007	39	M		12	12	-3.66667	56.5556	2.77778	0.444444	13.6667	5.55556
G	517007	G007	39	M		24	24	-15	267.889	-3.55556	6.11111	40.6667	4.22222
G	517009	G009	34	M		1	1	-4.22222	53	-3.11111	1.88889	16.1111	8.44444
G	517009	G009	34	M		2	2	-2.22222	25.3333	-13.4444	-0.777778	-0.222222	-3.88889
G	517009	G009	34	M		3	3	-1.55556	14.6667	-13.1111	-0.111111	-8.88889	-10.8889
G	517009	G009	34	M		12	12	-2.22222	27	-0.111111	-0.777778	5.11111	0.777778
G	517009	G009	34	M		24	24	-11.2222	138	-12.1111	-1.44444	13.4444	-7.88889
G	517010	G010	18	M		1	1	1.88889	-13	0.666667	-2	-1	1.77778
G	517010	G010	18	M		2	2	-3.44444	72.3333	-7.33333	1.42109e-14	9.66667	0.444444
G	517010	G010	18	M		3	3	-7.11111	135	-18.6667	-1	14.3333	-2.22222
G	517010	G010	18	M		12	12	-10.7778	162.333	-13.3333	1.33333	11	-12.2222
G	517010	G010	18	M		24	24	-5.44444	106.333	-0.666667	1.66667	16	3.11111
G	517011	G011	32	M		1	1	15.2222	-158.889	0.333333	1.33333	-10	16
G	517011	G011	32	M		2	2	7.55556	-87.5556	-0.666667	2.33333	-4	10
G	517011	G011	32	M		3	3	3.55556	-39.5556	5	-0.333333	-3.66667	2.33333
G	517011	G011	32	M		12	12	2.88889	-30.5556	-2.66667	0.666667	5.33333	10.6667
G	517011	G011	32	M		24	24	6.55556	-74.2222	3	-1.33333	-2.33333	9.33333
G	517012	G012	41	M		1	1	-4.66667	119.667	-4.11111	1.88889	20.6667	6.33333
G	517012	G012	41	M		2	2	-5.66667	157.667	-5.11111	2.88889	24.6667	5
G	517012	G012	41	M		3	3	-3.66667	97.3333	-14.4444	-0.777778	14.6667	3.33333
G	517012	G012	41	M		12	12	1	39.6667	6.55556	0.555556	14	10.6667
G	517012	G012	41	M		24	24	5.66667	-29	3.55556	-5.11111	-4.33333	3.33333
G	517013	G013	38	M		1	1	12.6667	-189.556	8.33333	-18.4444	-10	16.7778
G	517013	G013	38	M		2	2	12	-169.222	-8.66667	-14.1111	-4.66667	20.4444
G	517013	G013	38	M		3	3	6.66667	-107.222	-2.33333	1.88889	6	21.1111
G	517013	G013	38	M		12	12	5.33333	-61.8889	0.666667	11.5556	0.333333	9.44444
G	517013	G013	38	M		24	24	8	-97.8889	-9.66667	-9.44444	-2.33333	12.4444
G	517014	G014	24	M		1	1	2.33333	-29.8889	-7.88889	4	3.33333	7.55556
G	517014	G014	24	M		2	2	-4.33333	67.1111	0.111111	0.666667	5	-3.77778
G	517014	G014	24	M		3	3	3.66667	-59.2222	6.11111	0.333333	-10	-1.44444
G	517014	G014	24	M		12	12	7.66667	-121.556	-4.22222	0	-15	0.888889
G	517014	G014	24	M		24	24	6	-92.5556	-8.22222	1.66667	-11.6667	0.888889
G	517015	G015	20	M		1	1	2.33333	-37.2222	5.33333	-1.88889	6.22222	11.5556
G	517015	G015	20	M		2	2	6.33333	-89.8889	8.66667	0.444444	-5.77778	6.55556
G	517015	G015	20	M		3	3	9	-119.222	7.33333	-0.888889	-3.11111	14.5556
G	517015	G015	20	M		12	12	8.66667	-114.889	6.66667	1.44444	-22.7778	-6.44444
G	517015	G015	20	M		24	24	15	-200.889	6.66667	-1.55556	-25.7778	3.22222
G	517016	G016	22	F		1	1	-3.22222	41.4444	10.6667	-0.555556	5.66667	-1
G	517016	G016	22	F		2	2	3.11111	-45.5556	0.666667	2.11111	2	9
G	517016	G016	22	F		3	3	-2.55556	37.4444	-0.666667	3.77778	13	7
G	517016	G016	22	F		12	12	-2.88889	29.4444	13	4.44444	12	8
G	517016	G016	22	F		24	24	-4.22222	61.1111	9.66667	3.44444	16.6667	8.66667
G	517017	G017	45	F		1	1	-3.33333	85.2222	-2	-0.222222	13.2222	1.55556
G	517017	G017	45	F		2	2	-2	60.2222	0.666667	1.44444	25.2222	16.2222
G	517017	G017	45	F		3	3	-1.33333	39.5556	-2.84217e-14	-1.88889	20.8889	14.8889
G	517017	G017	45	F		12	12	-4	93.8889	-4.33333	-3.88889	20.2222	7.55556
G	517017	G017	45	F		24	24	-3.33333	91.8889	5.66667	-1.88889	26.5556	13.8889
G	517018	G018	39	F		1	1	3.77778	-49.8889	2.66667	-0.666667	12.3333	20.8889
G	517018	G018	39	F		2	2	0.777778	-4.88889	1	3.33333	11	12.5556
G	517018	G018	39	F		3	3	-7.22222	65.7778	2.66667	2.33333	22.6667	12.5556
G	517018	G018	39	F		12	12	8.77778	-103.222	-1.66667	-2	-7	9.22222
G	517018	G018	39	F		24	24	0.111111	-34.8889	3.66667	3.66667	13.6667	19.8889
G	517019	G019	24	M		1	1	3.77778	-49.2222	-3.33333	-0.555556	11.2222	19.3333
G	517019	G019	24	M		2	2	-2.22222	32.7778	-9.66667	-1.22222	7.88889	2.66667
G	517019	G019	24	M		3	3	-0.888889	25.4444	-8.33333	0.444444	17.5556	14.6667
G	517019	G019	24	M		12	12	7.77778	-105.222	-6.33333	-0.555556	-13.1111	1.66667
G	517019	G019	24	M		24	24	1.77778	-20.2222	5.66667	1.11111	-2.77778	0.333333
G	517020	G020	27	M		1	1	2.55556	-30.4444	-7.44444	0.888889	-8.66667	-4.44444
G	517020	G020	27	M		2	2	2.88889	-34.1111	-2.77778	2.88889	8.33333	13.8889
G	517020	G020	27	M		3	3	-6.44444	73.8889	0.555556	-0.444444	12	-0.111111
G	517020	G020	27	M		12	12	-8.44444	101.556	4.55556	6.88889	14.6667	-1.11111
G	517020	G020	27	M		24	24	-11.1111	148.556	-3.44444	3.55556	19.3333	-3.77778
G	517021	G021	39	M		1	1	-6	139.889	-1.77778	5.22222	37.1111	19.3333
G	517021	G021	39	M		2	2	1	-60.1111	0.555556	3.88889	11.7778	16.3333
G	517021	G021	39	M		3	3	-1.33333	15.5556	2.22222	5.22222	13.7778	11
G	517021	G021	39	M		12	12	-2	62.8889	-3.77778	2.88889	16.7778	9.66667
G	517021	G021	39	M		24	24	-7.66667	153.889	7.22222	2.55556	29.7778	10.3333
G	517022	G022	33	F		1	1	2	-31.8889	-3	-6	9	15.1111
G	517022	G022	33	F		2	2	-2	13.4444	-6	-1.66667	14.3333	12.1111
G	517022	G022	33	F		3	3	-4.33333	36.1111	0.333333	6.66667	17	11.1111
G	517022	G022	33	F		12	12	-4.66667	47.4444	8.33333	4.66667	14.6667	7.11111
G	517022	G022	33	F		24	24	-0.333333	1.77778	-4.33333	3.66667	11.3333	11.7778
G	517024	G024	45	F		1	1	12.5556	-127.667	-1.11111	1	2.77778	24.8889
G	517024	G024	45	F		2	2	9.22222	-94.6667	-2.44444	0.333333	1.77778	17.5556
G	517024	G024	45	F		3	3	3.22222	-33.3333	0.888889	1	10.7778	16.5556
G	517024	G024	45	F		12	12	3.22222	-20	2.55556	1	0.444444	3.88889
G	517024	G024	45	F		24	24	8.55556	-79.3333	-2.44444	-2.66667	-8.22222	4.88889
G	517025	G025	20	F		1	1	5.55556	-62.5556	9.88889	-4.77778	-7.22222	2.55556
G	517025	G025	20	F		2	2	-4.11111	78.1111	-14.1111	-2.11111	5.44444	-5.77778
G	517025	G025	20	F		3	3	-2.77778	40.1111	-32.7778	-0.111111	6.11111	0.555556
G	517025	G025	20	F		12	12	-5.11111	53.7778	-33.7778	2.55556	18.1111	10.5556
G	517025	G025	20	F		24	24	-2.44444	33.4444	-34.1111	4.22222	5.11111	0.888889
G	517026	G026	26	M		1	1	-2.11111	51.5556	-6.44444	-7.77778	10.1111	3.66667
G	517026	G026	26	M		2	2	-7.11111	133.222	-7.77778	-8.44444	7.44444	-10.6667
G	517026	G026	26	M		3	3	2.22222	-36.1111	-4.77778	-3.44444	-9.22222	-4
G	517026	G026	26	M		12	12	-6.77778	120.889	-10.7778	1.22222	14.1111	-1.33333
G	517026	G026	26	M		24	24	-2.44444	56.2222	-14.1111	-1.11111	-10.5556	-16.3333
G	517028	G028	33	M		1	1	6.22222	-115.333	10.2222	-4.55556	-11.3333	2.44444
G	517028	G028	33	M		2	2	4.55556	-78.3333	8.22222	1.44444	5	14.7778
G	517028	G028	33	M		3	3	-7.11111	148.333	6.55556	-2.55556	16.3333	-1.55556
G	517028	G028	33	M		12	12	-8.77778	138.667	-0.444444	5.77778	28	9.77778
G	517028	G028	33	M		24	24	-7.11111	135.667	1.88889	5.11111	29	11.7778
G	517029	G029	29	M		1	1	-0.888889	22.5556	1.66667	1.44444	14.7778	11.8889
G	517029	G029	29	M		2	2	2.44444	-57.4444	5.33333	2.11111	4.77778	10.5556
G	517029	G029	29	M		3	3	9.44444	-214.111	3.33333	3.44444	-14.5556	10.8889
G	517029	G029	29	M		12	12	0.444444	-32.7778	4.33333	2.44444	9.11111	12.2222
G	517029	G029	29	M		24	24	-3.55556	33.5556	4.33333	4.11111	19.4444	13.2222
G	517031	G031	41	M		1	1	4.55556	-101.889	2	-3.33333	8.22222	19.7778
G	517031	G031	41	M		2	2	11.5556	-243.889	3	-4.33333	-7.44444	24.1111
G	517031	G031	41	M		3	3	2.22222	-58.2222	-4.66667	-4	-1.77778	5.11111
G	517031	G031	41	M		12	12	7.55556	-184.556	-13.3333	-3.33333	-14.4444	8.11111
G	517031	G031	41	M		24	24	6.22222	-141.222	-2	-0.333333	-12.4444	4.44444
G	517032	G032	41	M		1	1	-0.777778	7.66667	-3.22222	3.11111	6.66667	6
G	517032	G032	41	M		2	2	-4.44444	49.3333	3.44444	3.11111	17.3333	10.3333
G	517032	G032	41	M		3	3	-11.4444	158.667	2.77778	1.77778	28.3333	6.66667
G	517032	G032	41	M		12	12	-0.111111	4.66667	-7.22222	2.11111	-4.33333	-5
G	517032	G032	41	M		24	24	3.88889	-56.6667	-11.8889	0.777778	-5.33333	3
G	517033	G033	37	M		1	1	-2.77778	86	-15.6667	-2.44444	31.6667	21.2222
G	517033	G033	37	M		2	2	-5.44444	143	-11.6667	-5.44444	34	16.2222
G	517033	G033	37	M		3	3	-0.111111	15.3333	-16.3333	-5.77778	38	35.5556
G	517033	G033	37	M		12	12	1.22222	4	-14.3333	-13.7778	0.666667	1.88889
G	517033	G033	37	M		24	24	3.88889	-52.3333	-24.3333	-8.11111	36.3333	43.8889
G	517034	G034	44	M		1	1	7.66667	-164.889	14.8889	6.77778	-24	-5.66667
G	517034	G034	44	M		2	2	5.66667	-128.556	7.88889	0.111111	-19	-4.66667
G	517034	G034	44	M		3	3	6.66667	-142.222	7.22222	7.11111	-17	-1.33333
G	517034	G034	44	M		12	12	9.66667	-169.556	2.22222	1.11111	-46	-25.6667
G	517034	G034	44	M		24	24	1.33333	-50.5556	21.5556	4.44444	-14	-9
G	517035	G035	27	M		1	1	5.66667	-75.2222	-12.1111	1.44444	9.33333	20.2222
G	517035	G035	27	M		2	2	-3	42.1111	-0.777778	0.777778	20.6667	15.8889
G	517035	G035	27	M		3	3	-12	171.111	-3.11111	-0.888889	41.3333	18.8889
G	517035	G035	27	M		12	12	-11.3333	154.778	0.888889	2.44444	27.3333	6.88889
G	517035	G035	27	M		24	24	-3.66667	66.1111	-5.11111	0.777778	27	19.8889
G	517036	G036	26	M		1	1	-0.333333	25.8889	7.77778	3.33333	10.4444	7.77778
G	517036	G036	26	M		2	2	8	-118.444	0.777778	1.66667	0.111111	16.1111
G	517036	G036	26	M		3	3	5	-67.4444	-2.22222	-0.333333	-7.88889	1.77778
G	517036	G036	26	M		12	12	-17.6667	204.222	18.1111	3.33333	46.1111	17.1111
G	517036	G036	26	M		24	24	4.66667	-50.1111	3.11111	4	5.77778	13.1111
G	517037	G037	28	M		1	1	4	-96.6667	6.55556	1.55556	-6.11111	6
G	517037	G037	28	M		2	2	-6	31.3333	2.22222	2.55556	3.22222	-4.33333
G	517037	G037	28	M		3	3	1.66667	-48	-2.11111	-1.44444	-6.44444	5.68434e-14
G	517037	G037	28	M		12	12	5	-104.667	1.55556	-4.77778	-14.7778	-1
G	517037	G037	28	M		24	24	-3.66667	66	-0.444444	-0.777778	-1.11111	-9
G	517038	G038	30	M		1	1	-10.2222	150.111	0	-0.555556	20.4444	0.777778
G	517038	G038	30	M		2	2	4.77778	-78.8889	0.333333	-0.222222	3.11111	13.1111
G	517038	G038	30	M		3	3	11.1111	-172.889	0.666667	-0.555556	-12.8889	9.77778
G	517038	G038	30	M		12	12	8.11111	-129.889	-1	1.77778	-12.5556	4.44444
G	517038	G038	30	M		24	24	2.44444	-42.2222	-7.66667	-0.888889	-1.88889	3.11111
G	517040	G040	27	M		1	1	-4.66667	70.4444	8.77778	-11.1111	8.55556	-1
G	517040	G040	27	M		2	2	6.66667	-94.8889	-3.88889	-9.77778	-16.4444	-2.33333
G	517040	G040	27	M		3	3	-0.666667	3.44444	-3.88889	-8.11111	-4.44444	-5
G	517040	G040	27	M		12	12	-1	3.77778	-15.5556	-9.44444	-7.44444	-8.33333
G	517040	G040	27	M		24	24	-11.3333	128.111	-7.55556	-7.11111	7.55556	-12.6667
G	517041	G041	20	M		1	1	4.55556	-103.556	-14.3333	-3.88889	-1.44444	11.2222
G	517041	G041	20	M		2	2	-1.44444	-11.2222	-18.6667	-3.55556	3.88889	3.55556
G	517041	G041	20	M		3	3	2.88889	-74.5556	-23.3333	-9.55556	-7.44444	0.888889
G	517041	G041	20	M		12	12	20.5556	-255.222	-23.3333	-9.55556	-29.1111	7.88889
G	517041	G041	20	M		24	24	-2.44444	10.4444	-26.3333	-7.55556	1.22222	-2.44444
G	517042	G042	30	F		1	1	12.4444	-160.556	10.7778	-1.55556	-19.2222	3.44444
G	517042	G042	30	F		2	2	-0.555556	-17.2222	15.1111	0.111111	-5.22222	-4.55556
G	517042	G042	30	F		3	3	5.11111	-84.8889	13.7778	-1.55556	-14.2222	-3.22222
G	517042	G042	30	F		12	12	7.44444	-111.889	13.7778	-3.88889	-19.8889	-5.22222
G	517042	G042	30	F		24	24	5.11111	-81.8889	10.4444	-2.22222	-7.88889	2.44444
G	517043	G043	40	F		1	1	-3.44444	40.8889	-47.4444	-11.1111	-2.22222	-8.33333
G	517043	G043	40	F		2	2	-6.11111	64.5556	-51.7778	-3.44444	22.1111	14
G	517043	G043	40	F		3	3	0.888889	0.222222	-51.1111	0.888889	0.111111	1.66667
G	517043	G043	40	F		12	12	-4.77778	49.2222	-60.1111	5.88889	4.44444	-3
G	517043	G043	40	F		24	24	-3.11111	40.8889	-50.4444	-3.44444	5.11111	-0.666667
G	517044	G044	38	F		1	1	13	-176.333	-21.6667	-6.22222	-23.1111	3.22222
G	517044	G044	38	F		2	2	8.33333	-125.667	-20.6667	-11.8889	-18.1111	-0.444444
G	517044	G044	38	F		3	3	11.3333	-156.667	-21.3333	-18.5556	-11.7778	12.2222
G	517044	G044	38	F		12	12	0.666667	-59.6667	-10	-8.88889	11.5556	19.2222
G	517044	G044	38	F		24	24	-0.333333	-34.3333	-8.66667	-7.22222	13.8889	17.5556
G	517045	G045	44	F		1	1	9.44444	-136.667	-3.66667	-3.44444	9.11111	29.7778
G	517045	G045	44	F		2	2	3.11111	-51	9.66667	-3.11111	24.7778	32.7778
G	517045	G045	44	F		3	3	4.77778	-68	-0.666667	-1.77778	19.1111	30.1111
G	517045	G045	44	F		12	12	-7.55556	64	-7.66667	-4.77778	17.4444	6.11111
G	517045	G045	44	F		24	24	2.44444	-44.6667	6.66667	-7.11111	-4.55556	1.11111
G	517046	G046	41	F		1	1	-0.444444	3.33333	-2.66667	4.66667	20.4444	20.1111
G	517046	G046	41	F		2	2	1.88889	-27	-4.33333	1.33333	10.7778	15.4444
G	517046	G046	41	F		3	3	1.55556	-26	-1	2.66667	10.1111	13.7778
G	517046	G046	41	F		12	12	-0.777778	15.3333	3.33333	-2.66667	15.7778	14.1111
G	517046	G046	41	F		24	24	4.55556	-54.3333	-16	0.333333	4.44444	13.1111
G	517047	G047	32	F		1	1	6.11111	-78.2222	0.444444	0.111111	4.77778	16.8889
G	517047	G047	32	F		2	2	-8.22222	134.778	-5.22222	4.11111	34.1111	15.2222
G	517047	G047	32	F		3	3	-4.55556	71.1111	4.11111	3.44444	31.7778	21.8889
G	517047	G047	32	F		12	12	4.11111	-23.2222	-3.22222	-4.88889	-7.22222	-2.77778
G	517047	G047	32	F		24	24	5.11111	-59.5556	8.77778	-3.55556	-5.22222	4.22222
G	517048	G048	21	M		1	1	-7.11111	176.778	9.55556	-1.22222	28.7778	7.44444
G	517048	G048	21	M		2	2	6.55556	-154.222	5.55556	-1.55556	7.77778	25.1111
G	517048	G048	21	M		3	3	-7.77778	187.111	13.2222	3.11111	41.4444	18.1111
G	517048	G048	21	M		12	12	7.55556	-45.2222	11.8889	-1.88889	2.77778	10.7778
G	517048	G048	21	M		24	24	-6.77778	168.778	7.88889	-4.55556	31.4444	10.7778
F	1001	F1001	33.8192	M		1	1	10.3333	-136.333	12.6667	-4.33333	-9	10.6667
F	1001	F1001	33.8192	M		2	2	7.66667	-105	6	-1.66667	-18.3333	-3.66667
F	1001	F1001	33.8192	M		3	3	4.33333	-40.6667	4.66667	10.6667	17	23.6667
F	1001	F1001	33.8192	M		12	12	27.3333	-325.667	4	-13.3333	-57	-10
F	1001	F1001	33.8192	M		24	24	23	-294.333	6.66667	9	-19	24.6667
F	1002	F1002	26.2959	M		1	1	-9	133.333	-3.66667	1.33333	26.3333	9
F	1002	F1002	26.2959	M		2	2	-1.66667	32.6667	-3.33333	-1	18	14.6667
F	1002	F1002	26.2959	M		3	3	4.66667	-50.6667	2.33333	-3	10.3333	19.3333
F	1002	F1002	26.2959	M		12	12	-6	98	-6	1.33333	19	7.33333
F	1002	F1002	26.2959	M		24	24	-14	175.667	-1	-2.33333	24.3333	-1.33333
F	1003	F1003	21.0767	M		1	1	-3	44.3333	-1.33333	3.33333	9.66667	3.33333
F	1003	F1003	21.0767	M		2	2	-1.33333	14.6667	7.33333	4.66667	5.66667	3.33333
F	1003	F1003	21.0767	M		3	3	1	-11	-2.66667	2	0.666667	2
F	1003	F1003	21.0767	M		12	12	3.66667	-37	-7.66667	2	10	16.3333
F	1003	F1003	21.0767	M		24	24	0.333333	-11.6667	-2.33333	3.66667	-1.33333	-0.666667
F	1004	F1004	41.5562	M		1	1	1.66667	-5	9	-7	-2.33333	-0.666667
F	1004	F1004	41.5562	M		2	2	10.3333	-133	-0.666667	-13.6667	-14.3333	5
F	1004	F1004	41.5562	M		3	3	1.33333	-2.66667	-10	-7.66667	3.33333	5
F	1004	F1004	41.5562	M		12	12	-1	21	-17.3333	-7	-3.33333	-5.33333
F	1004	F1004	41.5562	M		24	24	6	-73.3333	-9	-10	-13.3333	-2.33333
F	1005	F1005	22.3808	M		1	1	-2	21	5	-2.33333	1	-2
F	1005	F1005	22.3808	M		2	2	3.33333	-40	-2.33333	-2	-1.33333	5
F	1005	F1005	22.3808	M		3	3	-2	19.6667	-8.66667	-2.33333	-1.33333	-4.66667
F	1005	F1005	22.3808	M		12	12	-2.33333	26.6667	-15.3333	-2	4.33333	0.666667
F	1005	F1005	22.3808	M		24	24	4.33333	-53.6667	-5	-0.333333	-14.6667	-7.33333
F	1006	F1006	38.9151	M		1	1	5	-74.6667	-3.66667	-7.66667	-14.3333	-5.66667
F	1006	F1006	38.9151	M		2	2	1.66667	2	4	-6.66667	6.66667	5.33333
F	1006	F1006	38.9151	M		3	3	18.3333	-323	12	-7.66667	-23.6667	16
F	1006	F1006	38.9151	M		12	12	6	-115.667	-28.3333	-1.66667	-14	0.666667
F	1006	F1006	38.9151	M		24	24	7.66667	-129.333	-8.33333	-7.66667	-19	-2.66667
F	1007	F1007	36.0274	M		1	1	2	-31.3333	5.66667	-16	-5.66667	-1.33333
F	1007	F1007	36.0274	M		2	2	1.66667	-29.6667	4.33333	-6.66667	-5	-1
F	1007	F1007	36.0274	M		3	3	4.33333	-36.6667	6	-4	-4.66667	1.66667
F	1007	F1007	36.0274	M		12	12	-3.66667	14.3333	-22	0.333333	9.66667	6.66667
F	1007	F1007	36.0274	M		24	24	-1	-2.66667	-3.33333	-5.33333	2	2
F	1008	F1008	34.7644	M		1	1	6.33333	-128.667	7.66667	-7.66667	-3.66667	12.3333
F	1008	F1008	34.7644	M		2	2	-7.66667	137.333	-2	-7.66667	9.33333	-9.33333
F	1008	F1008	34.7644	M		3	3	-4.66667	91	5.33333	0.666667	8.66667	-4
F	1008	F1008	34.7644	M		12	12	1.33333	-11	-17	-9.66667	-10	-7.66667
F	1008	F1008	34.7644	M		24	24	3.66667	-93.6667	7.66667	-3.66667	-22.3333	-11
F	1009	F1009	54.3397	M		1	1	1	-15.3333	-1	-0.666667	-4.66667	-2.66667
F	1009	F1009	54.3397	M		2	2	-2	14	2.33333	5	6	3
F	1009	F1009	54.3397	M		3	3	2	-43.3333	0.666667	4	-3	3
F	1009	F1009	54.3397	M		12	12	-9.33333	91.6667	-22.6667	-1.42109e-14	8.33333	-6.66667
F	1009	F1009	54.3397	M		24	24	-1.33333	11.3333	7.33333	4.66667	-2	-4
F	1010	F1010	34.1562	M		1	1	6	-129.333	2	3.66667	13.6667	28.6667
F	1010	F1010	34.1562	M		2	2	7.66667	-175	-1	-2	5.66667	26.6667
F	1010	F1010	34.1562	M		3	3	14	-268.333	1.66667	1.33333	-11.3333	23.6667
F	1010	F1010	34.1562	M		12	12	17.3333	-266.333	-9	-3.33333	-19.6667	18
F	1010	F1010	34.1562	M		24	24	8	-167.667	-1.66667	-1.33333	-1.66667	18.6667
F	1011	F1011	55.3863	M		1	1	1.42109e-14	-1.13687e-13	-7.33333	-6.33333	5	5.66667
F	1011	F1011	55.3863	M		2	2	-2.66667	38.6667	-2	-5.33333	13.6667	8.33333
F	1011	F1011	55.3863	M		3	3	-5.66667	82.6667	-8	-10	21	9.33333
F	1011	F1011	55.3863	M		12	12	-0.333333	16	-8.66667	-20	10	9
F	1011	F1011	55.3863	M		24	24	-3	43.6667	-8.66667	-13.6667	0.333333	-5.66667
F	1012	F1012	30.7452	M		1	1	-15.3333	252	-25	-1.33333	43	8
F	1012	F1012	30.7452	M		2	2	-16.3333	277	-27.3333	-3	40	2
F	1012	F1012	30.7452	M		3	3	-14.6667	243	-25.3333	1.42109e-14	31.3333	-1.66667
F	1012	F1012	30.7452	M		12	12	-10.3333	161.333	-60.3333	-3.33333	22	0.666667
F	1012	F1012	30.7452	M		24	24	-8	125.667	-13.3333	-1.66667	9.33333	-8
F	1013	F1013	33.2932	M		1	1	22.6667	-367.667	-0.666667	-7.66667	-20.3333	28.6667
F	1013	F1013	33.2932	M		2	2	7	-132.333	3.66667	-6	32.3333	47.6667
F	1013	F1013	33.2932	M		3	3	4	-72.6667	2.66667	-8	13	22.3333
F	1013	F1013	33.2932	M		12	12	4.33333	-76	-8.66667	-3.66667	7	15.6667
F	1013	F1013	33.2932	M		24	24	-3.66667	62.6667	-10.6667	-0.666667	13	4.33333
F	1014	F1014	24.7644	M		1	1	-7.33333	167.667	-3	-8.66667	7.66667	-11.6667
F	1014	F1014	24.7644	M		2	2	8.66667	-128.333	-3.66667	-1.33333	-2.33333	16
F	1014	F1014	24.7644	M		3	3	-0.333333	31	-11.6667	0.666667	20.3333	17.6667
F	1014	F1014	24.7644	M		12	12	-6.33333	143.667	-20.6667	-2.33333	33	15.6667
F	1014	F1014	24.7644	M		24	24	-6.66667	160.667	-6.66667	-4.66667	41.6667	21.6667
F	1015	F1015	49.6932	M		1	1	-2.33333	39.6667	4	-0.666667	10.6667	4.33333
F	1015	F1015	49.6932	M		2	2	-3	52	7	2.66667	12	4
F	1015	F1015	49.6932	M		3	3	-5.33333	86.6667	1	1.33333	17	4.66667
F	1015	F1015	49.6932	M		12	12	-5	91.3333	-15	0.333333	18.3333	5
F	1015	F1015	49.6932	M		24	24	-7.66667	161.333	-9.66667	-1	18.6667	-2.66667
F	1016	F1016	50.6822	M		1	1	3.33333	-63.6667	5.66667	3	20.3333	26.3333
F	1016	F1016	50.6822	M		2	2	-1.33333	41	3.33333	1.66667	17.6667	12.6667
F	1016	F1016	50.6822	M		3	3	-1.33333	44	-4	3.33333	25.3333	20.3333
F	1016	F1016	50.6822	M		12	12	-5.33333	47.6667	-20.6667	-1.66667	17.3333	9.66667
F	1016	F1016	50.6822	M		24	24	0.333333	-18	-4.33333	-4.33333	7.66667	9.66667
F	1017	F1017	27.3178	F		1	1	-4.33333	51.3333	-11	4.66667	17	9.66667
F	1017	F1017	27.3178	F		2	2	-3.66667	47.6667	-10.3333	13.6667	17.3333	11
F	1017	F1017	27.3178	F		3	3	1.33333	1	-9.66667	6	17.6667	18.6667
F	1017	F1017	27.3178	F		12	12	-15	166	-34.3333	4.33333	34	8.33333
F	1017	F1017	27.3178	F		24	24	-7.66667	99.6667	-13.3333	4.33333	28	14.3333
F	1018	F1018	48.7753	F		1	1	11	-133.667	-3.66667	-2	-22	-1.33333
F	1018	F1018	48.7753	F		2	2	1	-17.6667	-12	7	4.33333	6.66667
F	1018	F1018	48.7753	F		3	3	-4	41.6667	-14.6667	1.66667	6	-0.333333
F	1018	F1018	48.7753	F		12	12	-3.66667	24	-32.6667	-1	5.66667	1.66667
F	1018	F1018	48.7753	F		24	24	7	-87	-13.3333	4.66667	-0.666667	14
F	1019	F1019	42.7671	F		1	1	6.33333	-77.6667	-12	-7.66667	0.333333	12.3333
F	1019	F1019	42.7671	F		2	2	5	-78	-8	3.66667	7	19
F	1019	F1019	42.7671	F		3	3	13	-207.667	-9.66667	-4	-4.33333	25.3333
F	1019	F1019	42.7671	F		12	12	15	-154	-14.3333	3	-8	16.6667
F	1019	F1019	42.7671	F		24	24	15.3333	-197.667	2.33333	-1.66667	-11.3333	18.6667
F	1020	F1020	41.7918	F		1	1	1.33333	-15.3333	0	8.33333	5.33333	7.66667
F	1020	F1020	41.7918	F		2	2	-0.666667	11.6667	-0.666667	4.33333	11	8.66667
F	1020	F1020	41.7918	F		3	3	-3	49	3.66667	6.66667	20.3333	12.3333
F	1020	F1020	41.7918	F		12	12	-4	58.3333	-13.6667	-1	5.33333	-5
F	1020	F1020	41.7918	F		24	24	1.33333	-23.3333	5.66667	2.66667	-3.66667	-0.666667
F	1021	F1021	33.9671	F		1	1	5	-65.6667	2.33333	3.33333	-6.66667	3.66667
F	1021	F1021	33.9671	F		2	2	-3.66667	77.3333	-3.66667	5	28.3333	19
F	1021	F1021	33.9671	F		3	3	4.33333	-83	5	-1.66667	24.6667	35
F	1021	F1021	33.9671	F		12	12	-3.66667	80.3333	-13.3333	-2.66667	7	-2.33333
F	1021	F1021	33.9671	F		24	24	-3	70.6667	-5.33333	3.33333	-2.66667	-11.6667
F	1022	F1022	33.1699	F		1	1	15	-155.667	-18	1	-18.6667	6.66667
F	1022	F1022	33.1699	F		2	2	9.33333	-114.333	-15.3333	1.33333	-7.33333	10.3333
F	1022	F1022	33.1699	F		3	3	-1.66667	16.6667	-23.3333	6.66667	17.3333	15.3333
F	1022	F1022	33.1699	F		12	12	2.33333	-23.3333	-39.3333	2.33333	9.33333	14
F	1022	F1022	33.1699	F		24	24	9.66667	-139.333	10.3333	-0.666667	-10	10.3333
F	1023	F1023	33.1534	F		1	1	14	-155.333	5.66667	-6.66667	-28.3333	-2
F	1023	F1023	33.1534	F		2	2	11.6667	-130.333	5.66667	0	-28.6667	-7.66667
F	1023	F1023	33.1534	F		3	3	12.3333	-132.333	7.33333	-1.66667	-30.6667	-9.33333
F	1023	F1023	33.1534	F		12	12	3.33333	-63.6667	-24.3333	3.66667	-20.3333	-10.6667
F	1023	F1023	33.1534	F		24	24	2.33333	-31.6667	14	-2	-4.66667	-0.333333
F	1024	F1024	29.5123	F		1	1	-6.33333	82.3333	-0.666667	1.33333	11.3333	-2
F	1024	F1024	29.5123	F		2	2	-5.66667	82	-5	0.333333	13.6667	1.66667
F	1024	F1024	29.5123	F		3	3	-1.33333	14.3333	-10	-6	-6.66667	-9.33333
F	1024	F1024	29.5123	F		12	12	-12.6667	128.667	-24.6667	4	21.6667	2
F	1024	F1024	29.5123	F		24	24	-7.66667	101.333	-7	4.33333	19.6667	5
F	1025	F1025	29.789	F		1	1	-20.6667	251	-4	-2.33333	59	24.3333
F	1025	F1025	29.789	F		2	2	-7	73.3333	-3.66667	-9	40.3333	31.3333
F	1025	F1025	29.789	F		3	3	-10.6667	124	-2.66667	4.66667	46.3333	29.6667
F	1025	F1025	29.789	F		12	12	-12.3333	156	-33	-11.6667	33.3333	12
F	1025	F1025	29.789	F		24	24	-5.33333	58.3333	-0.666667	0	24.3333	17.3333
F	1026	F1026	28.8055	F		1	1	5.66667	-83	-0.333333	1.33333	-7.33333	4.66667
F	1026	F1026	28.8055	F		2	2	-0.333333	10	-14.6667	2.66667	14.6667	13.6667
F	1026	F1026	28.8055	F		3	3	-7	112	-5.66667	1	22	6
F	1026	F1026	28.8055	F		12	12	1.33333	-28.3333	-18.3333	3.33333	-2.33333	1.66667
F	1026	F1026	28.8055	F		24	24	1	0	11	4.66667	-8.33333	-7.33333
F	1028	F1028	52.2521	F		1	1	1	-27	-1.33333	0	6.66667	10
F	1028	F1028	52.2521	F		2	2	1.33333	-35.6667	-0.333333	0	10.6667	14.6667
F	1028	F1028	52.2521	F		3	3	2.33333	-57.6667	-4	-1.66667	2.33333	9.33333
F	1028	F1028	52.2521	F		12	12	0.666667	-26.6667	-8.66667	-1	9.66667	13.3333
F	1028	F1028	52.2521	F		24	24	-2.33333	60.3333	5	-2	5.66667	-1.66667
F	1029	F1029	24.4986	F		1	1	0.666667	-22.3333	-12	-6	11.3333	14.3333
F	1029	F1029	24.4986	F		2	2	5.66667	-75.3333	-1.66667	-7	4	16
F	1029	F1029	24.4986	F		3	3	9	-118.333	4.66667	-9.33333	0.333333	19
F	1029	F1029	24.4986	F		12	12	5.33333	-60.3333	-11	-4.33333	2	11.6667
F	1029	F1029	24.4986	F		24	24	4.33333	-52.3333	-7	-7.66667	4.66667	13
F	1030	F1030	35.0356	F		1	1	20.3333	-198	8	0	-30	1.33333
F	1030	F1030	35.0356	F		2	2	18	-185	13	3	-23	6.66667
F	1030	F1030	35.0356	F		3	3	17.6667	-192.667	11	2	-22	8.33333
F	1030	F1030	35.0356	F		12	12	-1.42109e-14	2.66667	-15	2.33333	13.3333	14.3333
F	1030	F1030	35.0356	F		24	24	5	-48.6667	7	-3	-5	3.33333
F	1031	F1031	27.5808	F		1	1	2	-22.3333	-31.6667	-2	-15.3333	-11.6667
F	1031	F1031	27.5808	F		2	2	11.6667	-139	-6.33333	8	-18.3333	4.66667
F	1031	F1031	27.5808	F		3	3	9.33333	-113.667	-6.33333	9	-11.3333	7.33333
F	1031	F1031	27.5808	F		12	12	6.33333	-76.6667	-34	9	-25.3333	-13.3333
F	1031	F1031	27.5808	F		24	24	8.66667	-109.333	-27.6667	16	-21.3333	-4.33333
F	1032	F1032	38.5808	F		1	1	16	-245	1.33333	1.42109e-14	-3.66667	33
F	1032	F1032	38.5808	F		2	2	14.3333	-221.333	-0.333333	-0.333333	-23.6667	8.33333
F	1032	F1032	38.5808	F		3	3	9.66667	-146.333	-6	-0.333333	-1.66667	20
F	1032	F1032	38.5808	F		12	12	12.3333	-163.667	-11	-3.66667	0.666667	25.3333
F	1032	F1032	38.5808	F		24	24	15.3333	-203.667	-1.33333	-3.33333	8.33333	40.6667
F	1033	F1033	49.5781	M		1	1	-2.66667	69	0.666667	-0.666667	17.6667	9.33333
F	1033	F1033	49.5781	M		2	2	7.33333	-79.3333	13	1.33333	3	14.6667
F	1033	F1033	49.5781	M		3	3	7	-74.3333	5.66667	1.66667	-8.33333	3.33333
F	1033	F1033	49.5781	M		12	12	10.6667	-158.667	-3	0.666667	-17	4.66667
F	1033	F1033	49.5781	M		24	24	4.33333	-91.3333	-5.66667	2.66667	-10.6667	1
F	1034	F1034	41.1507	M		1	1	1.66667	-21.6667	2.66667	11.6667	9.33333	12.3333
F	1034	F1034	41.1507	M		2	2	1.33333	-30	-1	14.3333	17	20.3333
F	1034	F1034	41.1507	M		3	3	4	-61.6667	7	7.33333	3.33333	11.6667
F	1034	F1034	41.1507	M		12	12	6	-84.6667	-10.6667	-0.333333	4.33333	16
F	1034	F1034	41.1507	M		24	24	4.66667	-64	-9.33333	7.33333	14.3333	23
F	1035	F1035	32.2192	M		1	1	-1.66667	18.6667	-1	0.333333	6.66667	3.33333
F	1035	F1035	32.2192	M		2	2	0.666667	-7	0	-2.33333	5.68434e-14	0.666667
F	1035	F1035	32.2192	M		3	3	6.33333	-90.6667	-2.66667	-5.66667	-9.33333	4.33333
F	1035	F1035	32.2192	M		12	12	8.33333	-90.3333	-16.3333	-6.33333	-4	9
F	1035	F1035	32.2192	M		24	24	6.33333	-94.6667	2.33333	-1.66667	-20.6667	-7.33333
F	1036	F1036	33.4493	M		1	1	-2	25.3333	2.33333	-0.333333	12.6667	9.33333
F	1036	F1036	33.4493	M		2	2	-2	28	0.333333	3	16	12.3333
F	1036	F1036	33.4493	M		3	3	-3.33333	49.6667	-2.33333	2.33333	20.6667	14
F	1036	F1036	33.4493	M		12	12	-1.33333	15.6667	-7	4.33333	15	13.3333
F	1036	F1036	33.4493	M		24	24	1	-8	-1.33333	-1	-8.33333	-8
F	1037	F1037	35.1151	M		1	1	1.33333	-22	3	0	-7.33333	-3.66667
F	1037	F1037	35.1151	M		2	2	3.33333	-58.3333	-2	-4.33333	-11.3333	-3.66667
F	1037	F1037	35.1151	M		3	3	8	-139.333	-7	-6.33333	-31	-12.3333
F	1037	F1037	35.1151	M		12	12	13.6667	-185.667	-17.3333	-0.333333	-21	6
F	1037	F1037	35.1151	M		24	24	8	-136.667	2.66667	-7.33333	-16.3333	1.66667
F	1038	F1038	21.8767	M		1	1	-17	249	-18.6667	-2.33333	20.6667	-14.6667
F	1038	F1038	21.8767	M		2	2	-9.66667	157.333	-6.66667	-2.33333	11.3333	-10.6667
F	1038	F1038	21.8767	M		3	3	-13.3333	164.333	-20	0.666667	18.6667	-7
F	1038	F1038	21.8767	M		12	12	-4	57	-20	-4	-2.66667	-11.6667
F	1038	F1038	21.8767	M		24	24	3.66667	-96.3333	12.3333	-2.33333	-12.6667	-2.33333
F	1039	F1039	37.2904	M		1	1	7.66667	-103.667	-11.3333	5.33333	-14	1
F	1039	F1039	37.2904	M		2	2	6.66667	-96.6667	-2.33333	5.66667	-4.66667	9
F	1039	F1039	37.2904	M		3	3	-0.666667	7	-7.33333	7	11.3333	10.6667
F	1039	F1039	37.2904	M		12	12	-0.666667	12.6667	-15	4.33333	11.6667	10
F	1039	F1039	37.2904	M		24	24	0.333333	-3.33333	-10	5.66667	5.33333	6
F	1040	F1040	48.1041	M		1	1	1.33333	-29.6667	-1	1	6	10
F	1040	F1040	48.1041	M		2	2	1	-12	-3.66667	0	10	12.6667
F	1040	F1040	48.1041	M		3	3	-3	69.3333	-11	0.666667	16	9.33333
F	1040	F1040	48.1041	M		12	12	-3.66667	85	-24.6667	1.33333	12	4
F	1040	F1040	48.1041	M		24	24	-3.66667	83.3333	-3.66667	0	14.6667	5.66667
F	1041	F1041	39.3918	M		1	1	-5.33333	95.3333	1.66667	9.33333	7	-5
F	1041	F1041	39.3918	M		2	2	2.33333	-87	2	2.66667	3	11
F	1041	F1041	39.3918	M		3	3	4.33333	-70	3.66667	6.33333	3.33333	11.6667
F	1041	F1041	39.3918	M		12	12	-6.66667	137.667	-13	2	8	-9.33333
F	1041	F1041	39.3918	M		24	24	-10	196.667	-13.6667	3	15.6667	-9.33333
F	1042	F1042	25.4658	M		1	1	-2	58.3333	3	-1.66667	-13.6667	-19.3333
F	1042	F1042	25.4658	M		2	2	1.66667	-76	-16	0.333333	7.33333	13.3333
F	1042	F1042	25.4658	M		3	3	2	-33	-6.33333	1.33333	0	3.33333
F	1042	F1042	25.4658	M		12	12	2.33333	3	-33	-3.33333	5.33333	7.33333
F	1042	F1042	25.4658	M		24	24	7.66667	-148.333	-4.66667	1	-6.66667	10.6667
F	1043	F1043	21.726	M		1	1	8.33333	-133.667	-4	-9.33333	-16.3333	2.33333
F	1043	F1043	21.726	M		2	2	10.3333	-183.667	6	1.66667	0	23
F	1043	F1043	21.726	M		3	3	1.66667	-39	-11.6667	-1.33333	-7.66667	-2.66667
F	1043	F1043	21.726	M		12	12	4.33333	-68.3333	-19	-7.33333	-11.6667	-2
F	1043	F1043	21.726	M		24	24	4.66667	-65.3333	0.666667	-10	-10.6667	-1.33333
F	1044	F1044	28.0137	M		1	1	2	-42.6667	-1	3	30.3333	35.3333
F	1044	F1044	28.0137	M		2	2	-1.66667	8.33333	1	2.33333	17	15
F	1044	F1044	28.0137	M		3	3	-2.66667	51.3333	-6.66667	0.333333	28.3333	21
F	1044	F1044	28.0137	M		12	12	5	-18.6667	-13.6667	5.33333	16.6667	22
F	1044	F1044	28.0137	M		24	24	-18.6667	297.333	-19.3333	11	64.6667	24.3333
F	1045	F1045	39.2548	M		1	1	-2.33333	37.3333	1.66667	-1.42109e-14	9	4.33333
F	1045	F1045	39.2548	M		2	2	-9.66667	144.333	-0.333333	2.33333	29.6667	9.33333
F	1045	F1045	39.2548	M		3	3	-9.33333	110.667	-8.66667	2	32.3333	15.6667
F	1045	F1045	39.2548	M		12	12	-6.33333	60.3333	-19.6667	-0.666667	17.3333	8.33333
F	1045	F1045	39.2548	M		24	24	-6.66667	66	-15.6667	4.66667	15.6667	6
F	1046	F1046	22.1918	M		1	1	14	-212.333	-25.6667	-1.66667	-16.3333	11.3333
F	1046	F1046	22.1918	M		2	2	17.6667	-292	-1	-0.333333	-30	6.66667
F	1046	F1046	22.1918	M		3	3	8.66667	-144.667	-19.3333	0	-16	1.33333
F	1046	F1046	22.1918	M		12	12	20.3333	-253	-15.3333	-3	-23	12
F	1046	F1046	22.1918	M		24	24	-5.33333	36.3333	-29.6667	-1.42109e-14	17.3333	9.33333
F	1047	F1047	47.0767	M		1	1	8.33333	-172.667	-5.66667	-5	-25	-5.33333
F	1047	F1047	47.0767	M		2	2	14.3333	-255.333	-4.33333	-3.33333	-36	-4.33333
F	1047	F1047	47.0767	M		3	3	9.33333	-187.333	-10.3333	3.33333	-32.6667	-10.3333
F	1047	F1047	47.0767	M		12	12	8	-153.667	-31.6667	-2	-39.6667	-22.6667
F	1047	F1047	47.0767	M		24	24	16	-313.667	-5	2.66667	-32.3333	5
F	1048	F1048	29.0055	M		1	1	8	-136	-8	-1.33333	2	20
F	1048	F1048	29.0055	M		2	2	5.66667	-78.6667	-15.6667	-4	3.33333	14.6667
F	1048	F1048	29.0055	M		3	3	10	-142	-16.6667	0	2.33333	23
F	1048	F1048	29.0055	M		12	12	-0.333333	1.66667	-32.6667	-1.66667	18.3333	18.6667
F	1048	F1048	29.0055	M		24	24	-2	26.6667	-14	-1	18	13
